# Supplementary material for: Response of Pseudomonas aeruginosa to the Innate Immune System-Derived Oxidants Hypochlorous Acid and Hypothiocyanous Acid
Source: PubMed Central journal article supplement (PMC7950407; doi:10.1128/jb.00300-20), 2020-12-18
Supplement: JB.00300-20-s0001.pdf [file JB.00300-20-s0001.pdf]

## Supplemental information

Response of *Pseudomonas aeruginosa* to the innate immune system-derived oxidants hypochlorous acid and hypothiocyanous acid

Katie V. Farrant, Livia Spiga, Jane C. Davies and Huw D. Williams

In this document: Fig S1-S9, Table S1, Table S2

In separate excel file: Data set S1 (RNA<sub>seq</sub> transcriptomic data)

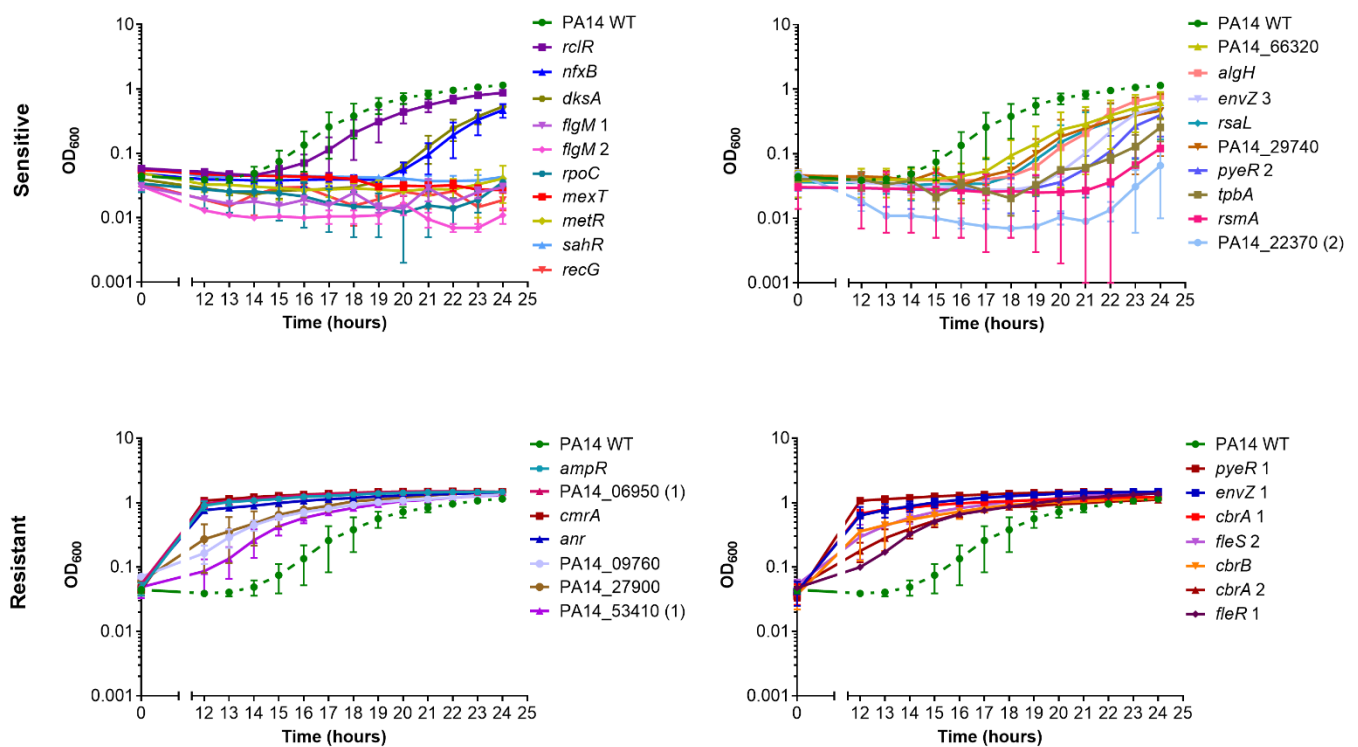

**FIG S1** Rescreen of resistant and sensitive strains identified from the HOCl screen. Strains were grown in LB medium with 4.4 mM HOCl, at 37°C with shaking. Graphs show regulatory gene mutant strains that displayed consistent HOCl-sensitive or resistant phenotypes but were not all statistically significant. The *pyeR 1* and *envZ 1* strains from the PA14 transposon library were constructed within the *exoU* mutant background, rather than the WT background (Table S1). We cannot rule out that this contributes to the observed opposing phenotype of *pyeR 1* and *pyeR 2*, and *envZ 1* and *envZ 3*. Graphs display the means and standard error of the means for two biological replicates from independent experiments. Strains grown in the absence of HOCl showed no growth defects (data not shown).

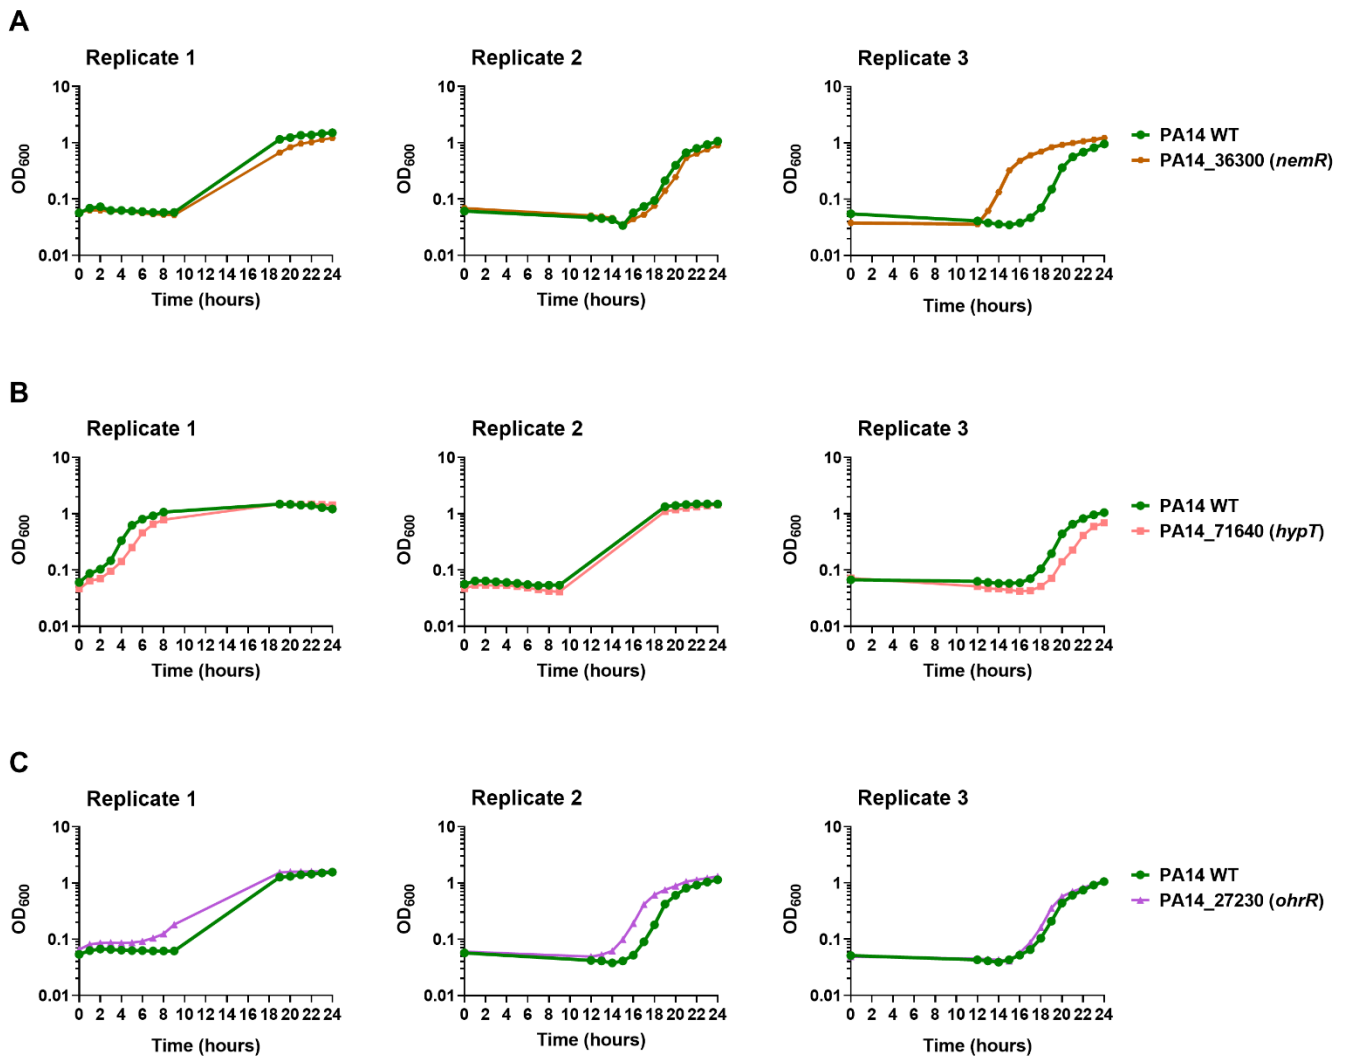

**FIG S2** Mutants of genes homologous to other HOCl-responsive transcriptional regulators from *E. coli* and *B. subtilis*: *nemR*, *hypT* and *ohrR*, did not display statistically different susceptibility to HOCl. Growth of (A) PA14 WT and PA14\_36300 (*nemR*) strains, (B) PA14 WT and PA14\_71640 (*hypT*) strains and (C) PA14 WT and PA14\_27230 (*ohrR*) strains, in the presence of 4.4 mM HOCl. Graphs show three biological replicates from independent experiments. Strains grown in the absence of HOCl showed no growth defects (data not shown).

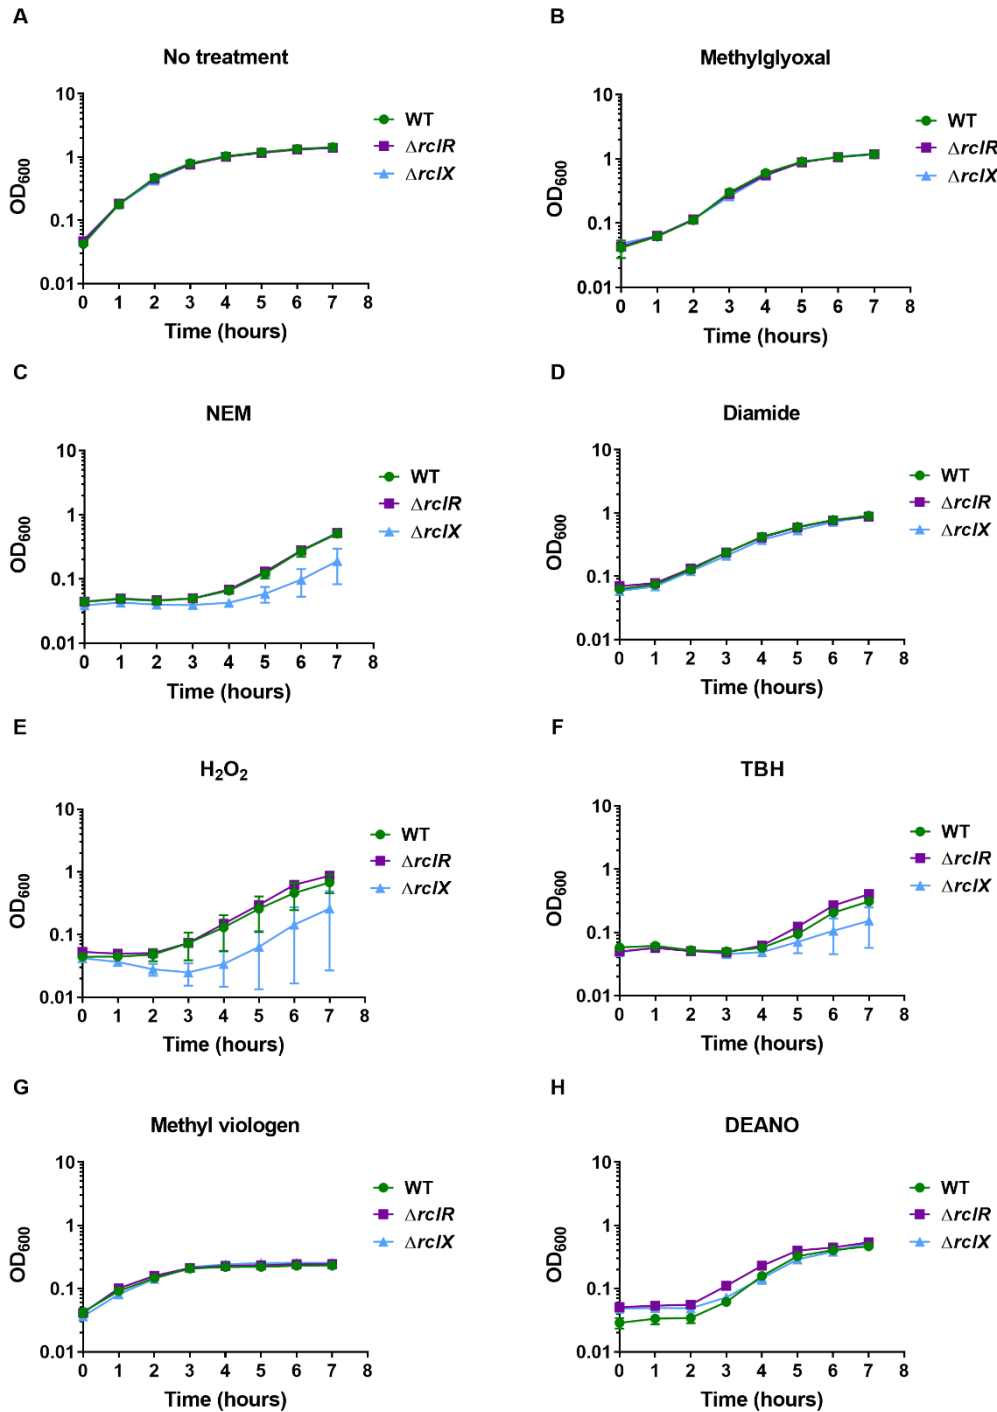

**FIG S3** Susceptibility of  $\Delta rcIR$  and  $\Delta rcIX$  to various reactive oxygen, electrophilic and nitrogen species. Growth curves of PA14 WT,  $\Delta rcIR$  and  $\Delta rcIX$  in (A) LB medium, (B) LB medium with 2.5 mM methylglyoxal, (C) LB medium with 0.125 mM NEM, (D) LB medium with 5 mM diamide, (E) LB medium with 5 mM H<sub>2</sub>O<sub>2</sub>, (F) LB medium with 0.5 mM TBH, (G) LB medium with 1 mM methyl viologen, (H) LB medium with 10 mM DEANO. Graphs display the means and standard error of the means for (A-H) three biological replicates and (H) six biological replicates.

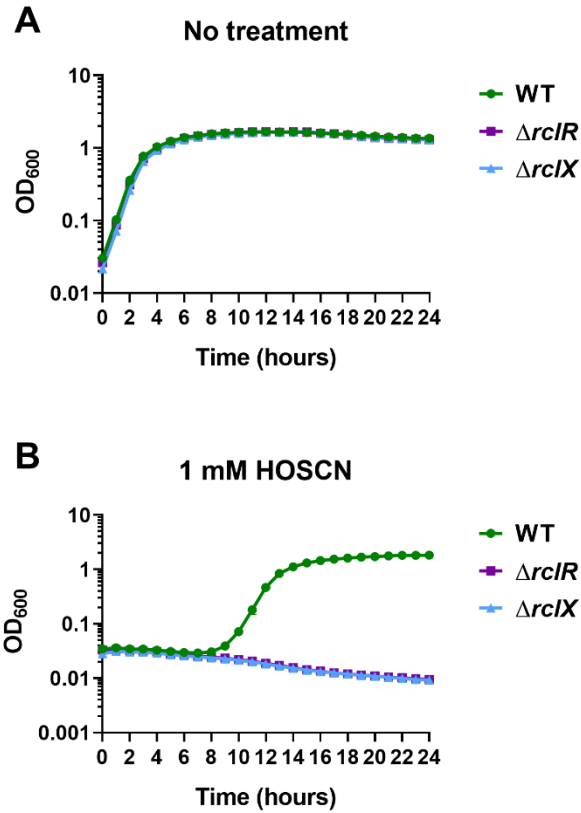

**FIG S4** Both  $\Delta rcIR$  and  $\Delta rcIX$  are sensitive to a higher concentration of HOSCN. Growth curves of PA14 WT,  $\Delta rcIR$  and  $\Delta rcIX$  in (A) LB medium, and (B) LB medium with 1mM HOSCN (0.02% glucose). Graphs display the means and standard error of the means for three biological replicates, representative of at least three independent experiments.

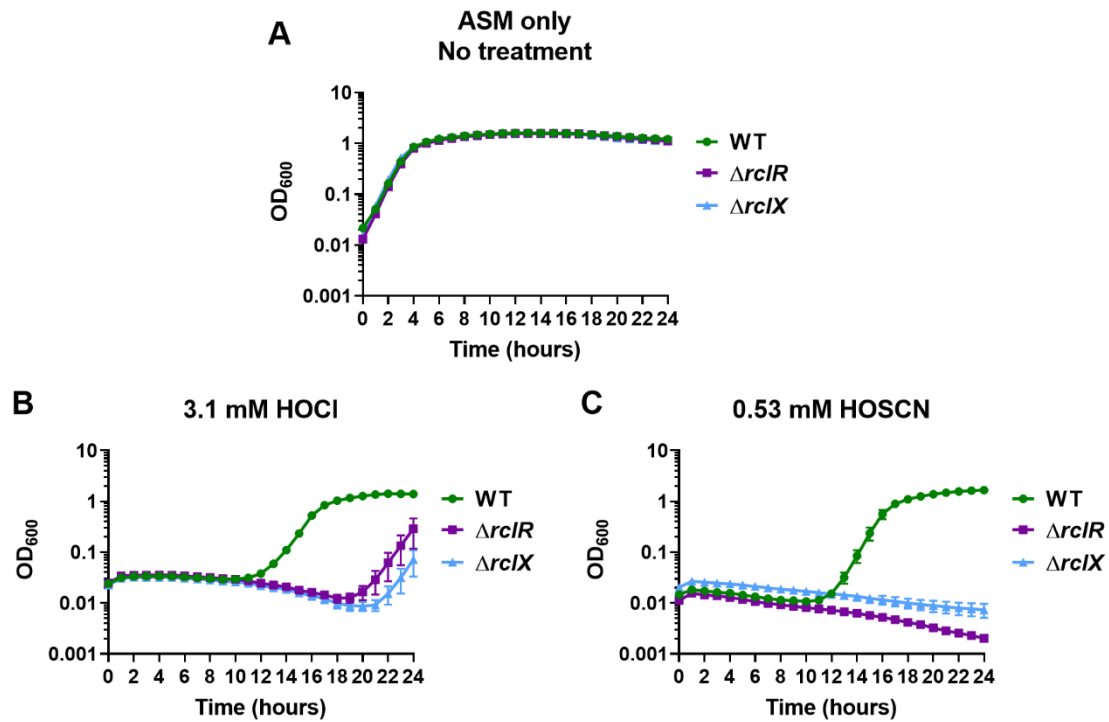

**FIG S5** Both  $\Delta rcIR$  and  $\Delta rcIX$  strains are sensitive to HOCl and HOSCN when grown in ASM medium. Growth of WT,  $\Delta rcIR$  and  $\Delta rcIX$  strains in 96-well plates, at 37°C with shaking in (A) ASM medium (no treatment), (B) ASM medium with 3.1 mM HOCl, and (C) ASM medium with 0.53 mM HOSCN. Graphs display the means and standard error of the means for three biological replicates, representative of three independent experiments.

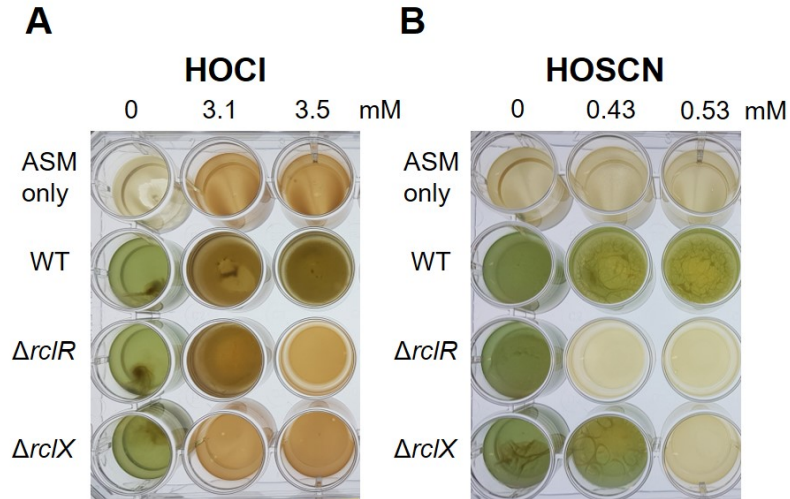

**FIG S6** Mutants of *rcIR* and *rcIX* are sensitive to HOCl and HOSCN when grown in an ASM biofilm model. Growth of PA14 WT,  $\Delta rcIR$  and  $\Delta rcIX$  in 24-well plates in (A) ASM in the absence or presence of 3.1 and 3.5 mM HOCl or (B) ASM in the absence or presence of 0.43 mM and 0.53 mM HOSCN. Strains were grown for 3 days at 37 °C, to allow biofilms to form, before leaving at room temperature for a further 4 days when biofilms could be clearly distinguished. *P. aeruginosa* formed both visible suspended biofilms and non-visible surface attached biofilms. Images are representative of three independent experiments.

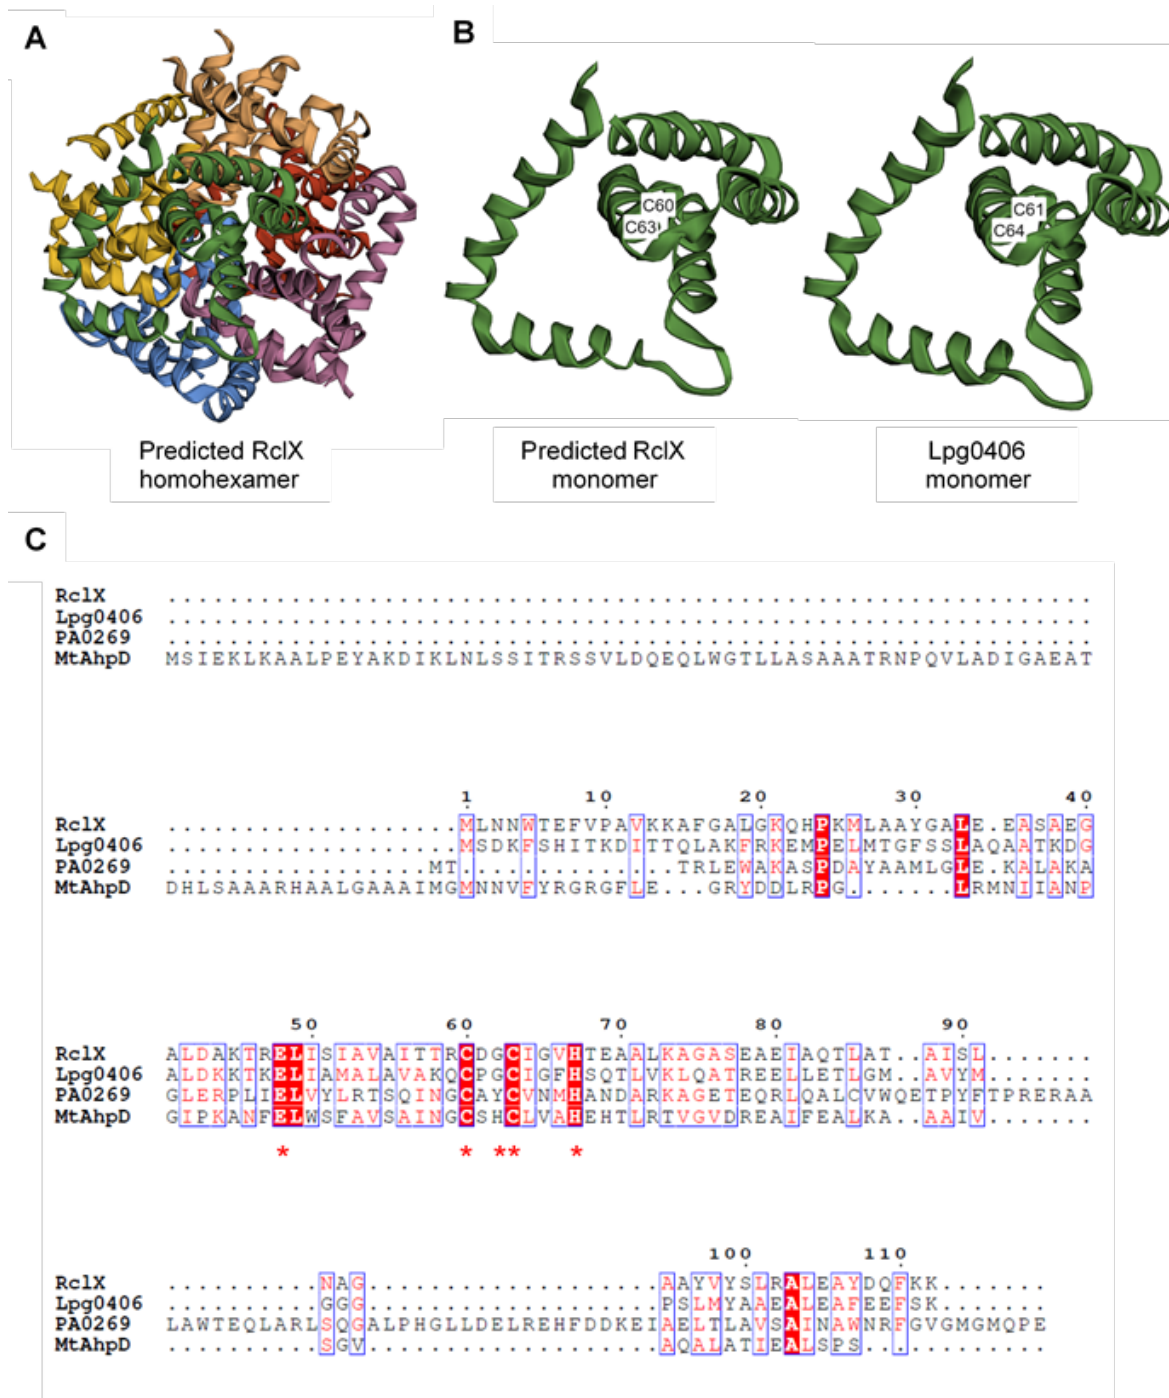

**FIG S7** Predicted structure of RclX and sequence alignment with three other AhpD proteins. Ribbon representation of RclX structure based on homology modelling with Lpg0406 (PDB: 5dik) from *Legionella pneumophila*, 32.1% identical: (A) Predicted homohexamer of RclX, each monomer coloured differently, (B) Predicted monomer of RclX (left) and monomer of Lpg0406 (right) consisting of six  $\alpha$ - helices, conserved catalytic cysteine residues are labelled. (C) Sequence alignment of RclX with Lpg0406, PA0269 from *P. aeruginosa* (15.3% identical), and MtAhpD from *Mycobacterium tuberculosis* (17% identical). Asterisks mark the five functional residues, E118, C130, H132, C133, H137, which form the proton relay system of MtAhpD (1, 2).

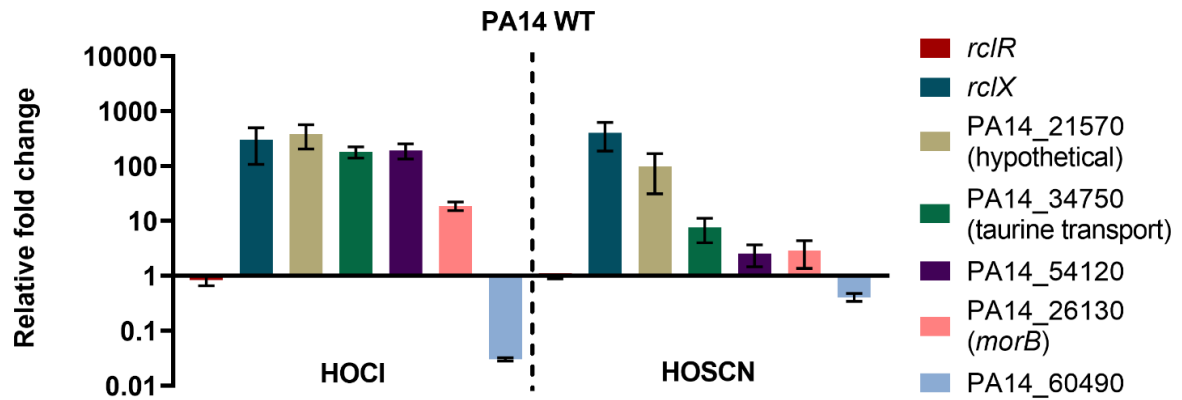

**FIG S8** Altered expression of select genes in PA14 WT in response to HOCl or HOSCN exposure as determined by qRT-PCR. Relative fold changes of *rclR*, *rclX*, PA14\_21570, PA14\_34750, PA14\_54120, PA14\_26130 and PA14\_60490 in PA14 WT following exposure to HOCl or HOSCN. Gene expression was normalised to the reference gene *rpoD*, which shows unchanged expression levels under the conditions tested, and fold changes were calculated relative to expression of each gene in PA14 WT untreated by the  $\Delta\Delta\text{CT}$  method. Graphs display the means and standard error of the means for three independent experiments.



Genes upregulated by HOCl or HOSCN

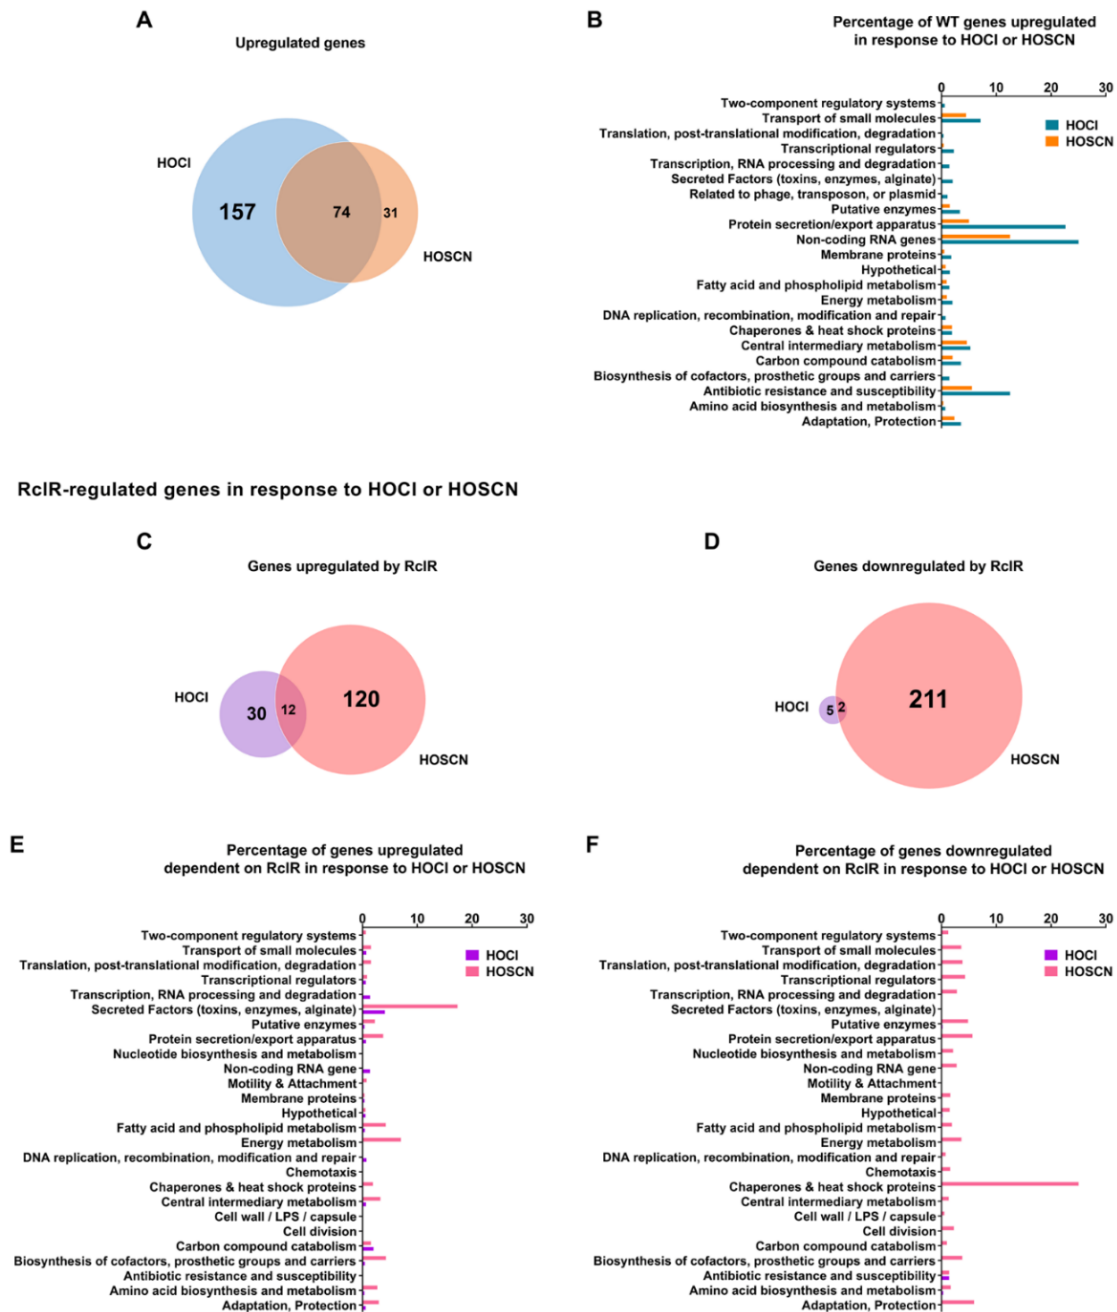

**FIG S9** Numbers of upregulated or downregulated genes and functional categorisation of genes with altered expression in PA14 WT and  $\Delta rclR$  after HOCl or HOSCN exposure. (A+B) Altered gene expression in the PA14 WT strain: (A) venn diagram of number of genes upregulated when comparing WT+ HOCl or HOSCN with WT untreated, (B) chart displays percentage of upregulated genes in different functional groups. (C-F) Altered gene expression in the  $\Delta rclR$  strain: venn diagrams of number of genes (C) upregulated or (D) downregulated when comparing WT+ HOCl or HOSCN with  $\Delta rclR$ + HOCl or HOSCN and charts display percentage of (E) upregulated or (F) downregulated genes in different functional groups. Venn diagrams display number of genes  $>1.5 \log_2$  fold change upregulated or  $<1.5 \log_2$  fold change downregulated. Charts display genes categorised into functional groups based on assigned gene ontologies in the *Pseudomonas* genome library and expressed as a percentage of the entire functional category in the PA14 genome.

**TABLE S1** Strains, plasmids and primers used in this study.

| Strain                                                                 | Relevant characteristics                                                                                                                           | Source/Library plate position  |
|------------------------------------------------------------------------|----------------------------------------------------------------------------------------------------------------------------------------------------|--------------------------------|
| <i>Pseudomonas aeruginosa</i>                                          |                                                                                                                                                    |                                |
| PA14                                                                   | Wild-type <i>P. aeruginosa</i> , clinical isolate CF lung                                                                                          | M. Ausubel, Harvard (3)        |
| <i>PA14 transposon insertion mutant library 707 regulatory mutants</i> | <b>ExMr: ExoUpsi3 background, MAR2xT7 transposon, Gm<sup>r</sup></b><br><b>PAMr: PA14 wild-type background, MAR2xT7 transposon, Gm<sup>r</sup></b> | <b>M. Ausubel, Harvard (4)</b> |
| PA14_00340                                                             | Sigma factor                                                                                                                                       | PAMr_nr_mas_02_3 F2            |
| PA14_00400                                                             | Transcriptional regulator                                                                                                                          | PAMr_nr_mas_01_3 D1            |
| PA14_00430                                                             | Two-component system                                                                                                                               | PAMr_nr_mas_12_3 D3            |
| PA14_00440 ( <i>trpA</i> )                                             | Two-component system                                                                                                                               | PAMr_nr_mas_07_2 A2            |
| PA14_00450 ( <i>trpB</i> )                                             | Two-component system                                                                                                                               | PAMr_nr_mas_10_4 F9            |
| PA14_00460 ( <i>trpI</i> )                                             | Transcriptional regulator                                                                                                                          | PAMr_nr_mas_04_1 C9            |
| PA14_00600                                                             | Transcriptional regulator                                                                                                                          | PAMr_nr_mas_06_2 D9            |
| PA14_00680                                                             | Transcriptional regulator                                                                                                                          | ExMr_nr_mas_01_2 E1            |
| PA14_00875 ( <i>ppkA</i> )                                             | Serine/Threonine kinase                                                                                                                            | PAMr_nr_mas_01_1 H3            |
| PA14_01410                                                             | Transcriptional regulator                                                                                                                          | PAMr_nr_mas_10_4 E5            |
| PA14_01460                                                             | Two-component system                                                                                                                               | PAMr_nr_mas_08_2 F10           |
| PA14_01470 (1)                                                         | Transcriptional regulator                                                                                                                          | PAMr_nr_mas_06_3 C8            |
| PA14_01470 (2)                                                         | Transcriptional regulator                                                                                                                          | PAMr_nr_mas_13_1 C6            |
| PA14_01480                                                             | Transcriptional regulator                                                                                                                          | PAMr_nr_mas_02_3 A5            |
| PA14_01500                                                             | Transcriptional regulator                                                                                                                          | PAMr_nr_mas_07_1 A10           |
| PA14_01640                                                             | Transcriptional regulator                                                                                                                          | PAMr_nr_mas_01_1 A9            |
| PA14_01840                                                             | Sigma factor                                                                                                                                       | PAMr_nr_mas_02_3 F11           |
| PA14_01860                                                             | Transmembrane sensor                                                                                                                               | PAMr_nr_mas_09_4 B12           |
| PA14_01980                                                             | Transcriptional regulator                                                                                                                          | PAMr_nr_mas_08_4 D7            |
| PA14_02030                                                             | Transcriptional regulator                                                                                                                          | ExMr_nr_mas_01_2 E9            |
| PA14_02090                                                             | Transcriptional regulator                                                                                                                          | PAMr_nr_mas_07_4 A5            |
| PA14_02110                                                             | Two-component system                                                                                                                               | PAMr_nr_mas_13_4 F9            |
| PA14_02230 ( <i>cheW</i> )                                             | Two-component system                                                                                                                               | PAMr_nr_mas_02_3 A11           |
| PA14_02250 ( <i>cheA</i> ) (1)                                         | Two-component system                                                                                                                               | PAMr_nr_mas_03_3 A1            |
| PA14_02250 ( <i>cheA</i> ) (2)                                         | Two-component system                                                                                                                               | PAMr_nr_mas_03_3 A3            |
| PA14_02260                                                             | Two-component system                                                                                                                               | PAMr_nr_mas_03_2 G8            |
| PA14_02290                                                             | Transcriptional regulator                                                                                                                          | PAMr_nr_mas_10_4 G8            |
| PA14_02660 (1)                                                         | Transcriptional regulator                                                                                                                          | PAMr_nr_mas_10_2 G9            |
| PA14_02660 (2)                                                         | Transcriptional regulator                                                                                                                          | PAMr_nr_mas_15_1 C8            |
| PA14_02750                                                             | Transcriptional regulator                                                                                                                          | PAMr_nr_mas_01_4 E4            |
| PA14_02910                                                             | Transcriptional regulator                                                                                                                          | PAMr_nr_mas_05_2 A4            |
| PA14_03010                                                             | Transcriptional regulator                                                                                                                          | PAMr_nr_mas_12_4 H1            |

|                                |                                |                      |
|--------------------------------|--------------------------------|----------------------|
| PA14_03070                     | Transcriptional regulator      | PAMr_nr_mas_04_3 E8  |
| PA14_03480                     | Transcriptional regulator      | PAMr_nr_mas_04_4 A8  |
| PA14_03530                     | Transcriptional regulator      | PAMr_nr_mas_02_2 G3  |
| PA14_03580                     | Transcriptional regulator      | PAMr_nr_mas_13_2 G4  |
| PA14_03720                     | Two-component system           | PAMr_nr_mas_04_3 D7  |
| PA14_03780                     | Transcriptional regulator      | PAMr_nr_mas_12_1 H8  |
| PA14_03790                     | Two-component system           | PAMr_nr_mas_10_1 F12 |
| PA14_03840 ( <i>aguR</i> )     | Transcriptional regulator      | PAMr_nr_mas_08_3 F1  |
| PA14_03860                     | Two-component system           | PAMr_nr_mas_12_3 A5  |
| PA14_03880 ( <i>spuB</i> )     | Two-component system           | PAMr_nr_mas_07_1 D2  |
| PA14_04000 (1)                 | Transcriptional regulator      | PAMr_nr_mas_07_2 G4  |
| PA14_04000 (2)                 | Transcriptional regulator      | PAMr_nr_mas_10_4 D5  |
| PA14_04160                     | Transcriptional regulator      | PAMr_nr_mas_03_2 D6  |
| PA14_04270                     | Transcriptional regulator      | PAMr_nr_mas_10_2 D6  |
| PA14_04420                     | Two-component system           | PAMr_nr_mas_14_1 A10 |
| PA14_04660                     | Two-component system           | PAMr_nr_mas_13_4 E3  |
| PA14_04820                     | Transcriptional regulator      | PAMr_nr_mas_02_3 H3  |
| PA14_05290 ( <i>algH</i> )     | Transcriptional regulator      | PAMr_nr_mas_07_3 H10 |
| PA14_05320 ( <i>pilG</i> )     | Two-component system           | PAMr_nr_mas_02_4 F3  |
| PA14_05330 ( <i>pilH</i> )     | Two-component system           | PAMr_nr_mas_11_3 D1  |
| PA14_05340 ( <i>pilI</i> )     | Two-component system           | PAMr_nr_mas_11_3 G8  |
| PA14_05360 ( <i>pilJ</i> ) (1) | Two-component system           | PAMr_nr_mas_08_2 D11 |
| PA14_05360 ( <i>pilJ</i> ) (2) | Two-component system           | PAMr_nr_mas_12_2 E9  |
| PA14_05380 ( <i>pilK</i> )     | Two-component system           | PAMr_nr_mas_12_4 E5  |
| PA14_05390 ( <i>chpA</i> )     | Two-component system           | PAMr_nr_mas_07_1 G8  |
| PA14_05410                     | Two-component system           | PAMr_nr_mas_03_3 G9  |
| PA14_05420                     | Transcriptional regulator      | PAMr_nr_mas_11_1 A9  |
| PA14_05660                     | Transcriptional regulator      | PAMr_nr_mas_05_4 G8  |
| PA14_05850                     | Transcriptional regulator      | PAMr_nr_mas_08_4 E1  |
| PA14_06060 ( <i>creB</i> )     | Two-component system           | PAMr_nr_mas_09_2 C6  |
| PA14_06070 ( <i>creC</i> )     | Two-component system           | PAMr_nr_mas_02_4 D10 |
| PA14_06180                     | Sigma factor                   | PAMr_nr_mas_02_2 B5  |
| PA14_06210                     | Transcriptional regulator      | PAMr_nr_mas_04_1 H7  |
| PA14_06240                     | Transcriptional regulator      | PAMr_nr_mas_09_2 A11 |
| PA14_06260                     | Transcriptional regulator      | PAMr_nr_mas_02_4 C11 |
| PA14_06310                     | Two-component system           | PAMr_nr_mas_06_2 C12 |
| PA14_06330                     | Serine/Threonine kinase        | PAMr_nr_mas_10_4 H6  |
| PA14_06340                     | Molybdenum transport regulator | PAMr_nr_mas_10_1 C4  |
| PA14_06400 (1)                 | Transcriptional regulator      | PAMr_nr_mas_10_1 H11 |
| PA14_06400 (2)                 | Transcriptional regulator      | PAMr_nr_mas_10_2 C9  |
| PA14_06690 ( <i>nirG</i> )     | Transcriptional regulator      | PAMr_nr_mas_07_2 G1  |
| PA14_06710                     | Transcriptional regulator      | PAMr_nr_mas_13_1 D9  |

|                                |                                   |                      |
|--------------------------------|-----------------------------------|----------------------|
| PA14_06770 ( <i>nirQ</i> ) (1) | Nucleoside triphosphate hydrolase | PAMr_nr_mas_01_1 E6  |
| PA14_06770 ( <i>nirQ</i> ) (2) | Nucleoside triphosphate hydrolase | PAMr_nr_mas_12_4 G10 |
| PA14_06870 ( <i>dnr</i> )      | Transcriptional regulator         | PAMr_nr_mas_06_1 E7  |
| PA14_06880                     | Transcriptional regulator         | PAMr_nr_mas_12_1 D7  |
| PA14_06950 (1)                 | Transcriptional regulator         | ExMr_nr_mas_01_1 C10 |
| PA14_06950 (2)                 | Transcriptional regulator         | PAMr_nr_mas_03_1 B8  |
| PA14_07110 ( <i>sahR</i> )     | Transcriptional regulator         | PAMr_nr_mas_14_1 E11 |
| PA14_07340 ( <i>rclR</i> )     | Transcriptional regulator         | PAMr_nr_mas_03_2 D2  |
| PA14_07680                     | Two-component system              | PAMr_nr_mas_02_3 F8  |
| PA14_07780                     | Serine/Threonine kinase           | PAMr_nr_mas_03_4 B4  |
| PA14_07820                     | Two-component system              | PAMr_nr_mas_08_3 E1  |
| PA14_07840                     | Two-component system              | PAMr_nr_mas_04_3 D10 |
| PA14_07940 ( <i>trpE</i> ) (1) | Two-component system              | PAMr_nr_mas_09_3 F8  |
| PA14_07940 ( <i>trpE</i> ) (2) | Two-component system              | PAMr_nr_mas_11_4 B8  |
| PA14_07950 ( <i>prtN</i> )     | Transcriptional regulator         | PAMr_nr_mas_12_2 H4  |
| PA14_08350 ( <i>trpD</i> )     | Two-component system              | PAMr_nr_mas_09_1 E3  |
| PA14_08360 ( <i>trpC</i> )     | Two-component system              | PAMr_nr_mas_12_3 G6  |
| PA14_08370 ( <i>vfr</i> )      | Transcriptional regulator         | PAMr_nr_mas_12_4 A4  |
| PA14_08780 ( <i>rpoC</i> )     | Sigma factor                      | PAMr_nr_mas_10_2 G3  |
| PA14_09150 ( <i>katA</i> ) (1) | Catalase                          | PAMr_nr_mas_04_2 H3  |
| PA14_09150 ( <i>katA</i> ) (2) | Catalase                          | PAMr_nr_mas_04_4 D2  |
| PA14_09150 ( <i>katA</i> ) (3) | Catalase                          | PAMr_nr_mas_15_3 A3  |
| PA14_09260 ( <i>pchR</i> )     | Transcriptional regulator         | PAMr_nr_mas_07_4 B6  |
| PA14_09570                     | Transcriptional regulator         | PAMr_nr_mas_05_3 E1  |
| PA14_09680 (1)                 | Two-component system              | PAMr_nr_mas_11_3 E10 |
| PA14_09680 (2)                 | Two-component system              | PAMr_nr_mas_13_2 A10 |
| PA14_09690                     | Two-component system              | PAMr_nr_mas_03_4 F6  |
| PA14_09760                     | Transcriptional regulator         | ExMr_nr_mas_01_2 H4  |
| PA14_09770                     | Transcriptional regulator         | PAMr_nr_mas_11_1 F4  |
| PA14_09790 (1)                 | Transcriptional regulator         | PAMr_nr_mas_04_1 E9  |
| PA14_09790 (2)                 | Transcriptional regulator         | PAMr_nr_mas_09_4 E10 |
| PA14_09790 (3)                 | Transcriptional regulator         | PAMr_nr_mas_15_1 A8  |
| PA14_09910                     | Transcriptional regulator         | PAMr_nr_mas_09_4 E1  |
| PA14_09960                     | Transcriptional regulator         | PAMr_nr_mas_08_2 H2  |
| PA14_10010                     | Transcriptional regulator         | PAMr_nr_mas_13_2 D1  |
| PA14_10090                     | Transcriptional regulator         | PAMr_nr_mas_04_1 C3  |
| PA14_10120                     | Transcriptional regulator         | PAMr_nr_mas_01_1 C4  |
| PA14_10190                     | Transcriptional regulator         | PAMr_nr_mas_08_4 F10 |
| PA14_10290 ( <i>acoR</i> )     | Transcriptional regulator         | PAMr_nr_mas_05_4 D5  |
| PA14_10320                     | Transcriptional regulator         | PAMr_nr_mas_09_4 H2  |
| PA14_10530 (1)                 | Transcriptional regulator         | PAMr_nr_mas_05_2 C12 |
| PA14_10530 (2)                 | Transcriptional regulator         | PAMr_nr_mas_07_1 F10 |

|                                |                           |                      |
|--------------------------------|---------------------------|----------------------|
| PA14_10660                     | Transcriptional regulator | PAMr_nr_mas_08_2 C8  |
| PA14_10670 ( <i>aph</i> )      | Phosphotransferase        | PAMr_nr_mas_08_3 B5  |
| PA14_10700 (1)                 | Two-component system      | PAMr_nr_mas_03_3 G2  |
| PA14_10700 (2)                 | Two-component system      | PAMr_nr_mas_04_2 G6  |
| PA14_10770 (1)                 | Two-component system      | PAMr_nr_mas_08_1 B5  |
| PA14_10770 (2)                 | Two-component system      | PAMr_nr_mas_13_2 F3  |
| PA14_10770 (3)                 | Two-component system      | PAMr_nr_mas_14_4 A12 |
| PA14_10800 ( <i>ampR</i> )     | Transcriptional regulator | ExMr_nr_mas_01_1 B5  |
| PA14_10830                     | Transcriptional regulator | PAMr_nr_mas_07_4 C5  |
| PA14_10940                     | Transcriptional regulator | PAMr_nr_mas_08_4 A9  |
| PA14_10980                     | Transcriptional regulator | PAMr_nr_mas_11_1 A10 |
| PA14_11120                     | Two-component system      | PAMr_nr_mas_08_4 D4  |
| PA14_11180                     | Transcriptional regulator | PAMr_nr_mas_05_3 D7  |
| PA14_11240 (1)                 | Transcriptional regulator | PAMr_nr_mas_11_1 B2  |
| PA14_11240 (2)                 | Transcriptional regulator | PAMr_nr_mas_14_4 B1  |
| PA14_11630                     | Two-component system      | PAMr_nr_mas_09_3 F9  |
| PA14_11680                     | Two-component system      | PAMr_nr_mas_02_2 C1  |
| PA14_11730                     | Serine/Threonine kinase   | PAMr_nr_mas_12_2 H8  |
| PA14_11830                     | Transcriptional regulator | PAMr_nr_mas_11_2 E4  |
| PA14_12140                     | Transcriptional regulator | PAMr_nr_mas_05_4 E3  |
| PA14_12440 (1)                 | Transcriptional regulator | ExMr_nr_mas_01_2 C11 |
| PA14_12440 (2)                 | Transcriptional regulator | PAMr_nr_mas_13_2 B1  |
| PA14_12570                     | Transcriptional regulator | PAMr_nr_mas_02_4 A5  |
| PA14_12780                     | Two-component system      | PAMr_nr_mas_12_2 A9  |
| PA14_12810 (1)                 | Two-component system      | PAMr_nr_mas_12_1 F5  |
| PA14_12810 (2)                 | Two-component system      | PAMr_nr_mas_14_2 D11 |
| PA14_12810 (3)                 | Two-component system      | PAMr_nr_mas_14_4 G4  |
| PA14_12820                     | Two-component system      | PAMr_nr_mas_09_4 F2  |
| PA14_13000                     | Transcriptional regulator | PAMr_nr_mas_12_4 E4  |
| PA14_13060                     | Transcriptional regulator | PAMr_nr_mas_01_1 D2  |
| PA14_13090 (1)                 | Two-component system      | PAMr_nr_mas_03_3 D12 |
| PA14_13090 (2)                 | Two-component system      | PAMr_nr_mas_15_3 F4  |
| PA14_13150 (1)                 | Transcriptional regulator | PAMr_nr_mas_12_1 C1  |
| PA14_13150 (2)                 | Transcriptional regulator | PAMr_nr_mas_15_1 H4  |
| PA14_13450                     | Transmembrane sensor      | PAMr_nr_mas_09_1 E2  |
| PA14_13470                     | Transcriptional regulator | PAMr_nr_mas_13_4 A1  |
| PA14_13510                     | Transcriptional regulator | PAMr_nr_mas_02_1 G8  |
| PA14_13660 ( <i>tpbA</i> )     | Two-component system      | PAMr_nr_mas_02_1 H7  |
| PA14_13740 ( <i>narX</i> )     | Two-component system      | PAMr_nr_mas_10_3 B1  |
| PA14_13780 ( <i>narG</i> )     | Two-component system      | PAMr_nr_mas_01_1 C10 |
| PA14_13800 ( <i>narH</i> ) (1) | Two-component system      | PAMr_nr_mas_03_3 F1  |
| PA14_13800 ( <i>narH</i> ) (2) | Two-component system      | PAMr_nr_mas_10_4 A11 |

|                                |                                     |                      |
|--------------------------------|-------------------------------------|----------------------|
| PA14_13810 ( <i>narJ</i> )     | Two-component system                | PAMr_nr_mas_01_4 E3  |
| PA14_13830 ( <i>narI</i> )     | Two-component system                | PAMr_nr_mas_09_4 C9  |
| PA14_14280                     | Transcriptional regulator           | PAMr_nr_mas_10_4 A6  |
| PA14_14480                     | Transcriptional regulator           | PAMr_nr_mas_01_1 A11 |
| PA14_14710                     | Transcriptional regulator           | PAMr_nr_mas_07_3 E9  |
| PA14_15150                     | Transcriptional regulator           | PAMr_nr_mas_03_1 C1  |
| PA14_15290                     | Two-component system                | PAMr_nr_mas_06_2 F7  |
| PA14_15450 ( <i>merD</i> ) (1) | Transcriptional regulator           | PAMr_nr_mas_05_1 F7  |
| PA14_15450 ( <i>merD</i> ) (2) | Transcriptional regulator           | PAMr_nr_mas_15_3 D1  |
| PA14_15650                     | Transcriptional regulator           | PAMr_nr_mas_01_4 C8  |
| PA14_15830                     | Transcriptional regulator           | PAMr_nr_mas_05_4 H6  |
| PA14_16280                     | Transcriptional regulator           | PAMr_nr_mas_05_1 B6  |
| PA14_16350                     | Two-component system                | PAMr_nr_mas_06_1 A11 |
| PA14_16440                     | Two-component system                | PAMr_nr_mas_02_1 A4  |
| PA14_16450 ( <i>wspC</i> )     | Two-component system                | ExMr_nr_mas_01_2 A2  |
| PA14_16460 ( <i>wspD</i> )     | Two-component system                | ExMr_nr_mas_01_1 F2  |
| PA14_16470                     | Two-component system                | PAMr_nr_mas_02_2 C11 |
| PA14_16480 ( <i>wspF</i> )     | Two-component system                | PAMr_nr_mas_04_1 C7  |
| PA14_16500 ( <i>wspR</i> )     | Two-component system                | PAMr_nr_mas_03_3 H5  |
| PA14_16550                     | Transcriptional regulator           | PAMr_nr_mas_07_4 G2  |
| PA14_16670                     | Transcriptional regulator           | PAMr_nr_mas_12_1 F6  |
| PA14_16790                     | Transcriptional regulator           | PAMr_nr_mas_12_3 G2  |
| PA14_17040 ( <i>glnD</i> )     | Two-component system                | PAMr_nr_mas_11_3 G11 |
| PA14_17380                     | Transcriptional regulator           | PAMr_nr_mas_05_3 H8  |
| PA14_17480 ( <i>rpoS</i> )     | Sigma factor                        | PAMr_nr_mas_05_3 A2  |
| PA14_17670                     | Two-component system                | PAMr_nr_mas_11_2 D1  |
| PA14_17720                     | Transcriptional regulator           | PAMr_nr_mas_13_1 B2  |
| PA14_17900 ( <i>metR</i> )     | Transcriptional regulator           | PAMr_nr_mas_12_1 F10 |
| PA14_17990                     | Predicted aminoacyl-tRNA synthetase | ExMr_nr_mas_01_1 G9  |
| PA14_18080                     | Transcriptional regulator           | PAMr_nr_mas_03_2 D1  |
| PA14_18110 ( <i>mmsR</i> ) (1) | Transcriptional regulator           | ExMr_nr_mas_01_1 F12 |
| PA14_18110 ( <i>mmsR</i> ) (2) | Transcriptional regulator           | PAMr_nr_mas_02_2 G4  |
| PA14_18200                     | Transcriptional regulator           | PAMr_nr_mas_14_2 F1  |
| PA14_18230 ( <i>fruR</i> ) (1) | Transcriptional regulator           | PAMr_nr_mas_01_2 C7  |
| PA14_18230 ( <i>fruR</i> ) (2) | Transcriptional regulator           | PAMr_nr_mas_04_4 C4  |
| PA14_18370                     | Two-component system                | PAMr_nr_mas_12_1 F8  |
| PA14_18580 ( <i>algD</i> )     | Two-component system                | PAMr_nr_mas_13_3 B12 |
| PA14_19120 ( <i>rhlR</i> )     | Transcriptional regulator           | PAMr_nr_mas_08_1 G7  |
| PA14_19190 (1)                 | Two-component system                | PAMr_nr_mas_01_1 H7  |
| PA14_19190 (2)                 | Two-component system                | PAMr_nr_mas_07_4 D9  |
| PA14_19340                     | Two-component system                | PAMr_nr_mas_04_2 D6  |
| PA14_19430                     | Two-component system                | PAMr_nr_mas_11_3 E8  |

|                                |                           |                      |
|--------------------------------|---------------------------|----------------------|
| PA14_19670                     | Transcriptional regulator | ExMr_nr_mas_01_2 F8  |
| PA14_19800 (1)                 | Transcriptional regulator | PAMr_nr_mas_04_3 D2  |
| PA14_19800 (2)                 | Transcriptional regulator | PAMr_nr_mas_13_2 G5  |
| PA14_19850                     | Transcriptional regulator | PAMr_nr_mas_07_2 F2  |
| PA14_20230 ( <i>nosR</i> )     | Transcriptional regulator | PAMr_nr_mas_12_3 G7  |
| PA14_20580 ( <i>amiC</i> )     | Transcriptional regulator | PAMr_nr_mas_07_2 D9  |
| PA14_20670                     | Two-component system      | PAMr_nr_mas_13_1 G7  |
| PA14_20730 ( <i>flgM</i> ) (1) | Sigma factor              | PAMr_nr_mas_13_2 F4  |
| PA14_20730 ( <i>flgM</i> ) (2) | Sigma factor              | PAMr_nr_mas_13_2 H6  |
| PA14_20750                     | Two-component system      | PAMr_nr_mas_02_3 H4  |
| PA14_20760                     | Two-component system      | PAMr_nr_mas_07_4 A4  |
| PA14_20770                     | Sigma factor              | PAMr_nr_mas_09_1 D11 |
| PA14_20780                     | Two-component system      | PAMr_nr_mas_05_1 C6  |
| PA14_20800 (1)                 | Two-component system      | PAMr_nr_mas_02_4 H3  |
| PA14_20800 (2)                 | Two-component system      | PAMr_nr_mas_03_2 D4  |
| PA14_20820 (1)                 | Two-component system      | PAMr_nr_mas_12_3 G1  |
| PA14_20820 (2)                 | Two-component system      | PAMr_nr_mas_14_4 E10 |
| PA14_20850                     | Transcriptional regulator | PAMr_nr_mas_08_3 E5  |
| PA14_21080                     | Transcriptional regulator | PAMr_nr_mas_07_4 B5  |
| PA14_21410 ( <i>phoA</i> ) (1) | Two-component system      | PAMr_nr_mas_07_2 C2  |
| PA14_21410 ( <i>phoA</i> ) 2   | Two-component system      | PAMr_nr_mas_13_2 D3  |
| PA14_21700 (1)                 | Two-component system      | PAMr_nr_mas_07_2 C4  |
| PA14_21700 (2)                 | Two-component system      | PAMr_nr_mas_15_2 B12 |
| PA14_21720                     | Transcriptional regulator | PAMr_nr_mas_11_3 B6  |
| PA14_21850                     | Transcriptional regulator | PAMr_nr_mas_13_4 B3  |
| PA14_21970                     | Transcriptional regulator | PAMr_nr_mas_02_2 F7  |
| PA14_22370 (1)                 | Two-component system      | PAMr_nr_mas_01_3 E4  |
| PA14_22370 (2)                 | Two-component system      | PAMr_nr_mas_13_4 A8  |
| PA14_22470                     | Transcriptional regulator | PAMr_nr_mas_03_4 G9  |
| PA14_22550 (1)                 | Transcriptional regulator | PAMr_nr_mas_13_1 G1  |
| PA14_22550 (2)                 | Transcriptional regulator | PAMr_nr_mas_15_2 F5  |
| PA14_22640 (1)                 | Transcriptional regulator | PAMr_nr_mas_05_3 H7  |
| PA14_22640 (2)                 | Transcriptional regulator | PAMr_nr_mas_15_2 E3  |
| PA14_22730                     | Two-component system      | PAMr_nr_mas_03_2 E2  |
| PA14_22860                     | Transcriptional regulator | PAMr_nr_mas_01_1 B11 |
| PA14_22940 ( <i>gltR</i> )     | Two-component system      | PAMr_nr_mas_06_2 D3  |
| PA14_22960                     | Two-component system      | PAMr_nr_mas_04_2 C9  |
| PA14_23060 ( <i>hexR</i> ) (1) | Transcriptional regulator | PAMr_nr_mas_01_3 C9  |
| PA14_23060 ( <i>hexR</i> ) (2) | Transcriptional regulator | PAMr_nr_mas_10_3 F2  |
| PA14_23130                     | Two-component system      | PAMr_nr_mas_04_2 A9  |
| PA14_23190                     | Transcriptional regulator | PAMr_nr_mas_11_4 G7  |
| PA14_23540 ( <i>act</i> )      | Transcriptional regulator | PAMr_nr_mas_03_3 F6  |

|                            |                                  |                      |
|----------------------------|----------------------------------|----------------------|
| PA14_23700                 | Transcriptional regulator        | PAMr_nr_mas_05_1 F11 |
| PA14_23720                 | Translation initiation inhibitor | PAMr_nr_mas_01_2 G10 |
| PA14_23730                 | Transcriptional regulator        | PAMr_nr_mas_13_1 G10 |
| PA14_24140                 | Transcriptional regulator        | PAMr_nr_mas_02_3 F4  |
| PA14_24340                 | Two-component system             | PAMr_nr_mas_12_3 C1  |
| PA14_24350 (1)             | Two-component system             | PAMr_nr_mas_03_1 C5  |
| PA14_24350 (2)             | Two-component system             | PAMr_nr_mas_15_2 B5  |
| PA14_24710                 | Two-component system             | PAMr_nr_mas_02_4 F2  |
| PA14_24720                 | Two-component system             | PAMr_nr_mas_12_2 H12 |
| PA14_24920                 | Transcriptional regulator        | PAMr_nr_mas_05_2 F7  |
| PA14_25800                 | Transcriptional regulator        | PAMr_nr_mas_02_4 E8  |
| PA14_26140                 | Transcriptional regulator        | PAMr_nr_mas_03_2 H12 |
| PA14_26150                 | Transcriptional regulator        | PAMr_nr_mas_12_4 G4  |
| PA14_26330 (1)             | Transcriptional regulator        | PAMr_nr_mas_01_3 F8  |
| PA14_26330 (2)             | Transcriptional regulator        | PAMr_nr_mas_05_1 H9  |
| PA14_26570                 | Transcriptional regulator        | PAMr_nr_mas_08_1 B3  |
| PA14_26590 (1)             | Transcriptional regulator        | PAMr_nr_mas_08_3 A7  |
| PA14_26590 (2)             | Transcriptional regulator        | PAMr_nr_mas_15_3 F8  |
| PA14_26600                 | Sigma factor                     | PAMr_nr_mas_01_1 C12 |
| PA14_26760                 | Transcriptional regulator        | PAMr_nr_mas_03_1 G12 |
| PA14_26810 (1)             | Two-component system             | PAMr_nr_mas_09_3 F11 |
| PA14_26810 (2)             | Two-component system             | PAMr_nr_mas_14_1 B1  |
| PA14_26860                 | Transcriptional regulator        | PAMr_nr_mas_10_3 F6  |
| PA14_26880                 | Transcriptional regulator        | PAMr_nr_mas_03_1 D4  |
| PA14_27230 ( <i>ohrR</i> ) | Transcriptional regulator        | PAMr_nr_mas_14_1 H5  |
| PA14_27250 (1)             | Transcriptional regulator        | PAMr_nr_mas_01_4 C12 |
| PA14_27250 (2)             | Transcriptional regulator        | PAMr_nr_mas_02_1 C1  |
| PA14_27280                 | Transcriptional regulator        | PAMr_nr_mas_03_2 C6  |
| PA14_27400                 | Transcriptional regulator        | PAMr_nr_mas_04_4 B4  |
| PA14_27440 (1)             | Transcriptional regulator        | PAMr_nr_mas_07_4 D7  |
| PA14_27440 (2)             | Transcriptional regulator        | PAMr_nr_mas_15_3 C10 |
| PA14_27550                 | Two-component system             | PAMr_nr_mas_08_3 E4  |
| PA14_27570                 | Two-component system             | PAMr_nr_mas_02_1 C11 |
| PA14_27700                 | Transcriptional regulator        | PAMr_nr_mas_05_3 H5  |
| PA14_27800 (1)             | Two-component system             | PAMr_nr_mas_06_1 G6  |
| PA14_27800 (2)             | Two-component system             | PAMr_nr_mas_09_3 C2  |
| PA14_27810 (1)             | Two-component system             | PAMr_nr_mas_07_3 C3  |
| PA14_27810 (2)             | Two-component system             | PAMr_nr_mas_10_1 D12 |
| PA14_27900                 | Transcriptional regulator        | PAMr_nr_mas_03_2 A4  |
| PA14_27940                 | Two-component system             | PAMr_nr_mas_09_4 A3  |
| PA14_27950                 | Sigma factor                     | PAMr_nr_mas_11_2 E2  |
| PA14_28080                 | Transcriptional regulator        | PAMr_nr_mas_11_1 D1  |



|                                |                           |                      |
|--------------------------------|---------------------------|----------------------|
| PA14_28130 (1)                 | Transcriptional regulator | PAMr_nr_mas_01_4 C4  |
| PA14_28130 (2)                 | Transcriptional regulator | PAMr_nr_mas_14_4 A11 |
| PA14_28320                     | Transcriptional regulator | PAMr_nr_mas_02_2 G12 |
| PA14_28420                     | Transcriptional regulator | PAMr_nr_mas_09_4 H6  |
| PA14_29260                     | Transcriptional regulator | PAMr_nr_mas_04_3 G9  |
| PA14_29300                     | Transcriptional regulator | PAMr_nr_mas_04_2 B9  |
| PA14_29360 ( <i>pfeS</i> )     | Two-component system      | PAMr_nr_mas_12_3 E12 |
| PA14_29590                     | Transcriptional regulator | PAMr_nr_mas_10_2 B10 |
| PA14_29620 (1)                 | Transcriptional regulator | PAMr_nr_mas_01_2 E8  |
| PA14_29620 (2)                 | Transcriptional regulator | PAMr_nr_mas_10_4 G2  |
| PA14_29660                     | Predicted NnrS protein    | PAMr_nr_mas_11_1 A1  |
| PA14_29740                     | Two-component system      | PAMr_nr_mas_09_4 C6  |
| PA14_30580                     | Transcriptional regulator | PAMr_nr_mas_12_4 C2  |
| PA14_30620                     | Transcriptional regulator | PAMr_nr_mas_02_1 C5  |
| PA14_30650 ( <i>gacA</i> ) (1) | Two-component system      | PAMr_nr_mas_06_3 G12 |
| PA14_30650 ( <i>gacA</i> ) (2) | Two-component system      | PAMr_nr_mas_15_3 F7  |
| PA14_30700                     | Two-component system      | PAMr_nr_mas_14_1 A6  |
| PA14_30830                     | Two-component system      | PAMr_nr_mas_13_1 G6  |
| PA14_30840                     | Two-component system      | PAMr_nr_mas_05_2 G6  |
| PA14_30970 (1)                 | Transcriptional regulator | PAMr_nr_mas_10_2 C11 |
| PA14_30970 (2)                 | Transcriptional regulator | PAMr_nr_mas_14_4 F1  |
| PA14_31110                     | Transcriptional regulator | PAMr_nr_mas_09_2 D3  |
| PA14_31380                     | Sigma factor              | PAMr_nr_mas_09_3 B5  |
| PA14_31480                     | Transcriptional regulator | PAMr_nr_mas_08_4 F7  |
| PA14_31560 (1)                 | Transcriptional regulator | PAMr_nr_mas_05_4 A6  |
| PA14_31560 (2)                 | Transcriptional regulator | PAMr_nr_mas_10_3 F12 |
| PA14_31620                     | Two-component system      | PAMr_nr_mas_01_4 H7  |
| PA14_31630                     | Transcriptional regulator | PAMr_nr_mas_09_4 C4  |
| PA14_31780                     | Transcriptional regulator | PAMr_nr_mas_08_4 D8  |
| PA14_31870                     | Two-component system      | PAMr_nr_mas_06_1 A4  |
| PA14_31890 (1)                 | Two-component system      | PAMr_nr_mas_06_4 H11 |
| PA14_31890 (2)                 | Two-component system      | PAMr_nr_mas_08_2 E2  |
| PA14_31900                     | Two-component system      | PAMr_nr_mas_04_2 F10 |
| PA14_31950                     | Two-component system      | PAMr_nr_mas_04_3 E4  |
| PA14_31960                     | Two-component system      | PAMr_nr_mas_05_4 E6  |
| PA14_32060 ( <i>xyIS</i> ) (1) | Transcriptional regulator | PAMr_nr_mas_09_1 C6  |
| PA14_32060 ( <i>xyIS</i> ) (2) | Transcriptional regulator | PAMr_nr_mas_14_1 F6  |
| PA14_32300                     | Two-component system      | PAMr_nr_mas_06_2 C9  |
| PA14_32360                     | Transcriptional regulator | PAMr_nr_mas_12_2 B10 |
| PA14_32410 ( <i>mexT</i> )     | Transcriptional regulator | PAMr_nr_mas_12_1 E6  |
| PA14_32450                     | Transcriptional regulator | PAMr_nr_mas_11_2 F8  |
| PA14_32460                     | Transcriptional regulator | PAMr_nr_mas_02_4 G7  |

|                                |                           |                      |
|--------------------------------|---------------------------|----------------------|
| PA14_32500 (1)                 | Transcriptional regulator | PAMr_nr_mas_01_4 A2  |
| PA14_32500 (2)                 | Transcriptional regulator | PAMr_nr_mas_11_3 D7  |
| PA14_32580                     | Two-component system      | PAMr_nr_mas_06_4 C10 |
| PA14_32700                     | Transcriptional regulator | PAMr_nr_mas_05_2 F11 |
| PA14_32940 (1)                 | Transcriptional regulator | PAMr_nr_mas_06_1 E9  |
| PA14_32940 (2)                 | Transcriptional regulator | PAMr_nr_mas_08_1 H7  |
| PA14_32970                     | Transcriptional regulator | ExMr_nr_mas_01_2 E2  |
| PA14_33170 (1)                 | Transcriptional regulator | PAMr_nr_mas_02_2 D4  |
| PA14_33170 (2)                 | Transcriptional regulator | PAMr_nr_mas_04_2 B4  |
| PA14_33260 ( <i>pvdS</i> )     | Sigma factor              | PAMr_nr_mas_06_2 G5  |
| PA14_33780                     | Transmembrane sensor      | PAMr_nr_mas_06_3 C3  |
| PA14_34150                     | Transcriptional regulator | PAMr_nr_mas_11_1 C6  |
| PA14_34210                     | Transcriptional regulator | PAMr_nr_mas_04_1 A1  |
| PA14_34440 ( <i>mtlR</i> )     | Transcriptional regulator | PAMr_nr_mas_03_3 B12 |
| PA14_34660 ( <i>gntR</i> )     | Transcriptional regulator | PAMr_nr_mas_04_4 G10 |
| PA14_34690                     | Transcriptional regulator | PAMr_nr_mas_07_3 A9  |
| PA14_34730                     | Transcriptional regulator | PAMr_nr_mas_06_1 B8  |
| PA14_34820                     | Transcriptional regulator | ExMr_nr_mas_01_2 G11 |
| PA14_34830                     | Transcriptional regulator | PAMr_nr_mas_13_1 H2  |
| PA14_35070 (1)                 | Transcriptional regulator | PAMr_nr_mas_01_3 B6  |
| PA14_35070 (2)                 | Transcriptional regulator | PAMr_nr_mas_14_4 F7  |
| PA14_35130 ( <i>arsR</i> )     | Transcriptional regulator | PAMr_nr_mas_09_2 E6  |
| PA14_35140                     | Transcriptional regulator | PAMr_nr_mas_14_1 H9  |
| PA14_35380 ( <i>ptxR</i> )     | Transcriptional regulator | PAMr_nr_mas_05_2 F9  |
| PA14_35540 ( <i>bkdR</i> )     | Transcriptional regulator | PAMr_nr_mas_11_4 E11 |
| PA14_35990                     | Phosphotransferase        | PAMr_nr_mas_13_1 E9  |
| PA14_36000 ( <i>prpR</i> )     | Transcriptional regulator | PAMr_nr_mas_01_3 A8  |
| PA14_36180                     | Transcriptional regulator | PAMr_nr_mas_03_4 E6  |
| PA14_36260                     | Two-component system      | PAMr_nr_mas_01_1 E12 |
| PA14_36300 ( <i>nemR</i> )     | Transcriptional regulator | PAMr_nr_mas_06_4 E6  |
| PA14_36420                     | Two-component system      | PAMr_nr_mas_09_1 B8  |
| PA14_36810 ( <i>katE</i> ) (1) | Catalase                  | PAMr_nr_mas_09_2 A10 |
| PA14_36810 ( <i>katE</i> ) (2) | Catalase                  | PAMr_nr_mas_13_1 F6  |
| PA14_36990                     | Two-component system      | PAMr_nr_mas_02_3 H6  |
| PA14_37080                     | Transcriptional regulator | PAMr_nr_mas_06_1 G7  |
| PA14_37120                     | Transcriptional regulator | PAMr_nr_mas_13_3 A12 |
| PA14_37140                     | Transcriptional regulator | PAMr_nr_mas_06_4 H12 |
| PA14_37660 (1)                 | Transcriptional regulator | PAMr_nr_mas_02_3 H5  |
| PA14_37660 (2)                 | Transcriptional regulator | PAMr_nr_mas_15_3 G9  |
| PA14_37690 (1)                 | Two-component system      | PAMr_nr_mas_02_4 E10 |
| PA14_37690 (2)                 | Two-component system      | PAMr_nr_mas_14_1 B2  |
| PA14_37940 ( <i>cynR</i> )     | Transcriptional regulator | PAMr_nr_mas_13_2 E10 |

|                                |                           |                      |
|--------------------------------|---------------------------|----------------------|
| PA14_37980 (1)                 | Fe(2+)-dicitrate sensor   | PAMr_nr_mas_08_2 A7  |
| PA14_37980 (2)                 | Fe(2+)-dicitrate sensor   | PAMr_nr_mas_14_4 G12 |
| PA14_37990                     | Sigma factor              | PAMr_nr_mas_07_1 H8  |
| PA14_38040 ( <i>cmrA</i> )     | Transcriptional regulator | PAMr_nr_mas_02_3 H1  |
| PA14_38140 (1)                 | Two-component system      | PAMr_nr_mas_01_2 D10 |
| PA14_38140 (2)                 | Two-component system      | PAMr_nr_mas_03_3 C1  |
| PA14_38250 (1)                 | Transcriptional regulator | PAMr_nr_mas_05_4 F6  |
| PA14_38250 (2)                 | Transcriptional regulator | PAMr_nr_mas_09_3 F3  |
| PA14_38300                     | Transcriptional regulator | PAMr_nr_mas_04_2 C4  |
| PA14_38380                     | Transcriptional regulator | PAMr_nr_mas_09_3 H8  |
| PA14_38430                     | Transcriptional regulator | PAMr_nr_mas_03_1 F3  |
| PA14_38500 (1)                 | Transcriptional regulator | PAMr_nr_mas_12_3 B7  |
| PA14_38500 (2)                 | Transcriptional regulator | PAMr_nr_mas_15_3 E10 |
| PA14_38570                     | Transcriptional regulator | PAMr_nr_mas_11_2 H11 |
| PA14_38610 (1)                 | Two-component system      | PAMr_nr_mas_08_2 H3  |
| PA14_38610 (2)                 | Two-component system      | PAMr_nr_mas_13_1 C10 |
| PA14_38680                     | Transcriptional regulator | PAMr_nr_mas_02_2 H3  |
| PA14_38900                     | Two-component system      | PAMr_nr_mas_08_2 B2  |
| PA14_39160                     | Transcriptional regulator | PAMr_nr_mas_07_3 G4  |
| PA14_39300 ( <i>rbsR</i> )     | Transcriptional regulator | PAMr_nr_mas_03_4 F12 |
| PA14_39360 (1)                 | Transcriptional regulator | PAMr_nr_mas_04_3 C5  |
| PA14_39360 (2)                 | Transcriptional regulator | PAMr_nr_mas_05_2 B11 |
| PA14_39460                     | Catalase                  | PAMr_nr_mas_10_3 D4  |
| PA14_39770                     | Two-component system      | PAMr_nr_mas_02_3 B7  |
| PA14_39800                     | Sigma factor              | ExMr_nr_mas_01_1 H6  |
| PA14_39980 ( <i>qscR</i> )     | Transcriptional regulator | PAMr_nr_mas_10_3 E8  |
| PA14_40380                     | Transcriptional regulator | PAMr_nr_mas_07_3 D11 |
| PA14_40440                     | Transcriptional regulator | PAMr_nr_mas_09_2 B1  |
| PA14_40550                     | Transcriptional regulator | PAMr_nr_mas_06_1 H4  |
| PA14_40570 (1)                 | Two-component system      | PAMr_nr_mas_09_4 E2  |
| PA14_40570 (2)                 | Two-component system      | PAMr_nr_mas_13_4 E11 |
| PA14_40600 (1)                 | Transcriptional regulator | PAMr_nr_mas_01_3 E1  |
| PA14_40600 (2)                 | Transcriptional regulator | PAMr_nr_mas_03_3 H8  |
| PA14_40790                     | Transcriptional regulator | PAMr_nr_mas_08_2 E11 |
| PA14_40880                     | Phosphotransferase        | PAMr_nr_mas_10_3 A12 |
| PA14_40910                     | Transcriptional regulator | PAMr_nr_mas_10_2 D7  |
| PA14_41220 ( <i>lon</i> )      | Lon serine protease       | PAMr_nr_mas_04_1 A9  |
| PA14_41260 (1)                 | Two-component system      | PAMr_nr_mas_13_4 G8  |
| PA14_41260 (2)                 | Two-component system      | PAMr_nr_mas_15_2 D5  |
| PA14_41270                     | Two-component system      | PAMr_nr_mas_03_3 E12 |
| PA14_41480 ( <i>nasS</i> ) (1) | Two-component system      | PAMr_nr_mas_01_1 C3  |
| PA14_41480 ( <i>nasS</i> ) (2) | Two-component system      | PAMr_nr_mas_01_3 A5  |

|                                |                            |                      |
|--------------------------------|----------------------------|----------------------|
| PA14_41490 ( <i>nasT</i> )     | Two-component system       | PAMr_nr_mas_10_4 A7  |
| PA14_41520                     | Serine/Threonine kinase    | PAMr_nr_mas_07_1 A5  |
| PA14_41800                     | Transcriptional regulator  | PAMr_nr_mas_09_2 B9  |
| PA14_41810                     | Transcriptional regulator  | PAMr_nr_mas_04_4 C7  |
| PA14_41830 ( <i>thrH</i> ) (1) | Serine/Threonine kinase    | ExMr_nr_mas_01_2 C6  |
| PA14_41830 ( <i>thrH</i> ) (2) | Serine/Threonine kinase    | PAMr_nr_mas_12_1 B12 |
| PA14_41870 ( <i>cysB</i> )     | Transcriptional regulator  | PAMr_nr_mas_10_3 B3  |
| PA14_42060                     | Transcriptional regulator  | PAMr_nr_mas_10_4 H9  |
| PA14_42090                     | Two-component system       | PAMr_nr_mas_08_1 H5  |
| PA14_42220 (1)                 | Membrane sensor            | PAMr_nr_mas_10_2 C5  |
| PA14_42220 (2)                 | Membrane sensor            | PAMr_nr_mas_15_1 B11 |
| PA14_42390 ( <i>exsA</i> )     | Transcriptional regulator  | PAMr_nr_mas_01_1 H9  |
| PA14_42460 ( <i>pcrH</i> )     | T3SS regulator             | PAMr_nr_mas_12_3 F4  |
| PA14_42880 ( <i>stkI</i> )     | Serine/Threonine kinase    | PAMr_nr_mas_06_1 F1  |
| PA14_42970                     | Transcriptional regulator  | PAMr_nr_mas_04_3 H5  |
| PA14_43200                     | Sigma factor               | PAMr_nr_mas_06_4 A5  |
| PA14_43240                     | Predicted Flavin reductase | PAMr_nr_mas_04_4 C2  |
| PA14_43350 ( <i>kdpD</i> ) (1) | Two-component system       | PAMr_nr_mas_05_2 A3  |
| PA14_43350 ( <i>kdpD</i> ) (2) | Two-component system       | PAMr_nr_mas_12_4 H3  |
| PA14_43380 ( <i>kdpB</i> ) (1) | Two-component system       | ExMr_nr_mas_01_1 E7  |
| PA14_43380 ( <i>kdpB</i> ) (2) | Two-component system       | PAMr_nr_mas_06_2 F6  |
| PA14_43400 ( <i>kdpA</i> ) (1) | Two-component system       | PAMr_nr_mas_06_2 F2  |
| PA14_43400 ( <i>kdpA</i> ) (2) | Two-component system       | PAMr_nr_mas_09_1 C5  |
| PA14_43430                     | Transcriptional regulator  | PAMr_nr_mas_09_3 D10 |
| PA14_43480                     | Transcriptional regulator  | PAMr_nr_mas_07_2 A7  |
| PA14_43670 (1)                 | Two-component system       | ExMr_nr_mas_01_2 A5  |
| PA14_43670 (2)                 | Two-component system       | PAMr_nr_mas_07_3 F3  |
| PA14_43720                     | Transcriptional regulator  | PAMr_nr_mas_02_4 F5  |
| PA14_43770                     | Transcriptional regulator  | PAMr_nr_mas_08_4 F4  |
| PA14_44180                     | Transcriptional regulator  | PAMr_nr_mas_12_1 F2  |
| PA14_44240                     | Two-component system       | PAMr_nr_mas_08_4 F6  |
| PA14_44300 ( <i>aer</i> )      | Two-component system       | PAMr_nr_mas_13_2 E11 |
| PA14_44490 ( <i>anr</i> )      | Transcriptional regulator  | PAMr_nr_mas_02_4 D9  |
| PA14_44690 (1)                 | Transcriptional regulator  | PAMr_nr_mas_12_2 A5  |
| PA14_44690 (2)                 | Transcriptional regulator  | PAMr_nr_mas_15_2 A9  |
| PA14_44980                     | Transcriptional regulator  | PAMr_nr_mas_08_3 D8  |
| PA14_45250                     | Transcriptional regulator  | PAMr_nr_mas_10_4 C2  |
| PA14_45460                     | Transcriptional regulator  | PAMr_nr_mas_06_1 A7  |
| PA14_45500                     | Two-component system       | PAMr_nr_mas_11_4 D3  |
| PA14_45510                     | Two-component system       | PAMr_nr_mas_08_2 A9  |
| PA14_45560 ( <i>motC</i> )     | Two-component system       | PAMr_nr_mas_04_3 B8  |
| PA14_45580                     | Two-component system       | PAMr_nr_mas_06_4 F6  |

|                                |                               |                      |
|--------------------------------|-------------------------------|----------------------|
| PA14_45590 (1)                 | Two-component system          | ExMr_nr_mas_01_2 B2  |
| PA14_45590 (2)                 | Two-component system          | PAMr_nr_mas_06_2 D4  |
| PA14_45590 (3)                 | Two-component system          | PAMr_nr_mas_13_3 E4  |
| PA14_45630 ( <i>fliA</i> ) (1) | Sigma factor                  | PAMr_nr_mas_03_3 E6  |
| PA14_45630 ( <i>fliA</i> ) (2) | Sigma factor                  | PAMr_nr_mas_14_4 D8  |
| PA14_45640 ( <i>fleN</i> )     | Flagellar synthesis regulator | PAMr_nr_mas_01_4 G10 |
| PA14_45870 (1)                 | Two-component system          | PAMr_nr_mas_05_1 A12 |
| PA14_45870 (2)                 | Two-component system          | PAMr_nr_mas_14_4 B4  |
| PA14_45880                     | Two-component system          | PAMr_nr_mas_07_2 B11 |
| PA14_45950 ( <i>rsaL</i> )     | Transcriptional regulator     | PAMr_nr_mas_12_1 C8  |
| PA14_46060 ( <i>gbuR</i> )     | Transcriptional regulator     | PAMr_nr_mas_03_2 F4  |
| PA14_46290                     | Transcriptional regulator     | PAMr_nr_mas_01_2 F5  |
| PA14_46330                     | Transcriptional regulator     | PAMr_nr_mas_04_4 G3  |
| PA14_46370                     | Two-component system          | PAMr_nr_mas_01_1 H6  |
| PA14_46400                     | Transcriptional regulator     | PAMr_nr_mas_09_2 H11 |
| PA14_46480                     | Transcriptional regulator     | PAMr_nr_mas_02_3 A4  |
| PA14_46570                     | Transcriptional regulator     | PAMr_nr_mas_10_3 C9  |
| PA14_46810                     | Sigma factor                  | PAMr_nr_mas_07_1 E11 |
| PA14_46850                     | Transcriptional regulator     | PAMr_nr_mas_04_3 E6  |
| PA14_46980                     | Two-component system          | PAMr_nr_mas_03_2 H8  |
| PA14_47240 (1)                 | Transcriptional regulator     | PAMr_nr_mas_12_1 F4  |
| PA14_47240 (2)                 | Transcriptional regulator     | PAMr_nr_mas_15_3 H3  |
| PA14_47270 (1)                 | Transcriptional regulator     | PAMr_nr_mas_02_2 H4  |
| PA14_47270 (2)                 | Transcriptional regulator     | PAMr_nr_mas_14_4 B12 |
| PA14_47390                     | Two-component system          | PAMr_nr_mas_09_2 E7  |
| PA14_47520                     | Transcriptional regulator     | PAMr_nr_mas_02_2 G8  |
| PA14_47580                     | Transcriptional regulator     | PAMr_nr_mas_12_2 H7  |
| PA14_47820                     | Transcriptional regulator     | PAMr_nr_mas_14_1 E10 |
| PA14_47880                     | Transcriptional regulator     | PAMr_nr_mas_01_3 H7  |
| PA14_47910                     | Transcriptional regulator     | PAMr_nr_mas_03_4 E7  |
| PA14_48160                     | Two-component system          | PAMr_nr_mas_09_1 H11 |
| PA14_48190                     | Transcriptional regulator     | PAMr_nr_mas_10_2 G4  |
| PA14_48390 (1)                 | Transcriptional regulator     | ExMr_nr_mas_01_2 D6  |
| PA14_48390 (2)                 | Transcriptional regulator     | PAMr_nr_mas_05_2 D10 |
| PA14_48390 (3)                 | Transcriptional regulator     | PAMr_nr_mas_07_4 H2  |
| PA14_48410                     | Serine/Threonine kinase       | PAMr_nr_mas_11_4 D10 |
| PA14_48420                     | Transcriptional regulator     | PAMr_nr_mas_09_1 F12 |
| PA14_48770 (1)                 | Transcriptional regulator     | PAMr_nr_mas_01_1 D10 |
| PA14_48770 (2)                 | Transcriptional regulator     | PAMr_nr_mas_15_3 A2  |
| PA14_48810                     | Transcriptional regulator     | PAMr_nr_mas_14_2 B5  |
| PA14_48830 (1)                 | Transcriptional regulator     | PAMr_nr_mas_03_4 C9  |
| PA14_48830 (2)                 | Transcriptional regulator     | PAMr_nr_mas_04_1 E11 |

|                                |                               |                      |
|--------------------------------|-------------------------------|----------------------|
| PA14_49130 ( <i>dctA</i> )     | Two-component system          | PAMr_nr_mas_10_1 F7  |
| PA14_49170 ( <i>phoQ</i> )     | Two-component system          | PAMr_nr_mas_05_4 G3  |
| PA14_49180 ( <i>phoP</i> )     | Two-component system          | PAMr_nr_mas_09_3 A3  |
| PA14_49420                     | Two-component system          | PAMr_nr_mas_03_4 E10 |
| PA14_49440 (1)                 | Two-component system          | PAMr_nr_mas_02_3 B11 |
| PA14_49440 (2)                 | Two-component system          | PAMr_nr_mas_08_4 B5  |
| PA14_49590                     | Transcriptional regulator     | PAMr_nr_mas_05_2 C9  |
| PA14_49640                     | Transcriptional regulator     | PAMr_nr_mas_02_2 C7  |
| PA14_49680 (1)                 | Transcriptional regulator     | PAMr_nr_mas_02_2 F3  |
| PA14_49680 (2)                 | Transcriptional regulator     | PAMr_nr_mas_06_4 B10 |
| PA14_49790                     | Transcriptional regulator     | PAMr_nr_mas_11_4 G12 |
| PA14_49890 ( <i>tpbB</i> )     | Two-component system          | PAMr_nr_mas_08_1 D6  |
| PA14_50040 (1)                 | Transcriptional regulator     | PAMr_nr_mas_04_1 G9  |
| PA14_50040 (2)                 | Transcriptional regulator     | PAMr_nr_mas_15_1 D3  |
| PA14_50180 ( <i>fleR</i> ) (1) | Two-component system          | PAMr_nr_mas_04_1 F11 |
| PA14_50180 ( <i>fleR</i> ) (2) | Two-component system          | PAMr_nr_mas_05_4 G11 |
| PA14_50200 ( <i>fleS</i> ) (1) | Two-component system          | PAMr_nr_mas_10_3 C5  |
| PA14_50200 ( <i>fleS</i> ) (2) | Two-component system          | PAMr_nr_mas_12_4 F12 |
| PA14_50220 ( <i>fleQ</i> ) (1) | Transcriptional regulator     | PAMr_nr_mas_01_3 H6  |
| PA14_50220 ( <i>fleQ</i> ) (2) | Transcriptional regulator     | PAMr_nr_mas_10_1 A1  |
| PA14_50290 ( <i>fliC</i> )     | Two-component system          | PAMr_nr_mas_07_3 A8  |
| PA14_50600                     | Transcriptional regulator     | PAMr_nr_mas_13_2 H11 |
| PA14_51280                     | Transcriptional regulator     | PAMr_nr_mas_04_3 F3  |
| PA14_51340 ( <i>mvfR</i> )     | Transcriptional regulator     | PAMr_nr_mas_12_1 G5  |
| PA14_51360 ( <i>phnA</i> ) (1) | Two-component system          | PAMr_nr_mas_04_1 H11 |
| PA14_51360 ( <i>phnA</i> ) (2) | Two-component system          | PAMr_nr_mas_11_3 C1  |
| PA14_51990 ( <i>wrbA</i> )     | Trp repressor binding protein | PAMr_nr_mas_07_4 D2  |
| PA14_52070 ( <i>pqrR</i> )     | Transcriptional regulator     | PAMr_nr_mas_02_3 G11 |
| PA14_52240                     | Two-component system          | PAMr_nr_mas_05_4 B10 |
| PA14_52250                     | Two-component system          | ExMr_nr_mas_01_2 E7  |
| PA14_52260 (1)                 | Two-component system          | PAMr_nr_mas_12_1 G4  |
| PA14_52260 (2)                 | Two-component system          | PAMr_nr_mas_15_2 H9  |
| PA14_52570 ( <i>rsmA</i> )     | Transcriptional regulator     | PAMr_nr_mas_11_2 A2  |
| PA14_52740 ( <i>argR</i> )     | Transcriptional regulator     | PAMr_nr_mas_04_2 G8  |
| PA14_52810                     | Two-component system          | PAMr_nr_mas_11_1 E9  |
| PA14_52820                     | Two-component system          | PAMr_nr_mas_14_2 A4  |
| PA14_52930                     | Transcriptional regulator     | PAMr_nr_mas_05_3 F9  |
| PA14_52980 ( <i>phhR</i> )     | Transcriptional regulator     | PAMr_nr_mas_01_3 D6  |
| PA14_53090                     | Transcriptional regulator     | PAMr_nr_mas_11_4 A12 |
| PA14_53410 (1)                 | Transcriptional regulator     | PAMr_nr_mas_13_1 E10 |
| PA14_53410 (2)                 | Transcriptional regulator     | PAMr_nr_mas_14_4 B9  |
| PA14_53520 ( <i>oruR</i> )     | Transcriptional regulator     | PAMr_nr_mas_04_1 E10 |

|                                |                              |                      |
|--------------------------------|------------------------------|----------------------|
| PA14_53550                     | Transcriptional regulator    | PAMr_nr_mas_09_1 A3  |
| PA14_53730                     | Transcriptional regulator    | PAMr_nr_mas_06_4 C7  |
| PA14_53920                     | Transcriptional regulator    | PAMr_nr_mas_14_1 B6  |
| PA14_54010                     | Transcriptional regulator    | PAMr_nr_mas_03_1 D5  |
| PA14_54130                     | Transcriptional regulator    | PAMr_nr_mas_08_3 H9  |
| PA14_54410 ( <i>mucB</i> ) (1) | Transcriptional regulator    | ExMr_nr_mas_01_1 F9  |
| PA14_54410 ( <i>mucB</i> ) (2) | Transcriptional regulator    | PAMr_nr_mas_02_1 G6  |
| PA14_54430 ( <i>algU</i> )     | Sigma factor                 | PAMr_nr_mas_09_3 C3  |
| PA14_54500                     | Two-component system         | PAMr_nr_mas_08_1 F6  |
| PA14_54510                     | Two-component system         | PAMr_nr_mas_02_4 A4  |
| PA14_54540                     | Two-component system         | PAMr_nr_mas_02_3 B1  |
| PA14_54570                     | Two-component system         | PAMr_nr_mas_04_4 C8  |
| PA14_54610                     | Transcriptional regulator    | PAMr_nr_mas_12_2 C11 |
| PA14_55150                     | Transcriptional regulator    | PAMr_nr_mas_10_1 F10 |
| PA14_55250                     | Transcriptional regulator    | PAMr_nr_mas_01_1 D8  |
| PA14_55730                     | Transcriptional regulator    | PAMr_nr_mas_08_2 H7  |
| PA14_55780                     | Two-component system         | PAMr_nr_mas_11_4 B9  |
| PA14_55810                     | Two-component system         | PAMr_nr_mas_08_3 C3  |
| PA14_56070 ( <i>mvaT</i> )     | Transcriptional regulator    | PAMr_nr_mas_06_3 B7  |
| PA14_56430                     | Transcriptional regulator    | PAMr_nr_mas_13_3 E7  |
| PA14_56620 ( <i>pyeR</i> ) (1) | Transcriptional regulator    | ExMr_nr_mas_01_1 C5  |
| PA14_56620 ( <i>pyeR</i> ) (2) | Transcriptional regulator    | PAMr_nr_mas_11_4 A10 |
| PA14_56790                     | Two-component system         | PAMr_nr_mas_12_3 H6  |
| PA14_56950                     | Two-component system         | PAMr_nr_mas_02_2 H8  |
| PA14_57140                     | Two-component system         | PAMr_nr_mas_04_4 C12 |
| PA14_57170                     | Two-component system         | PAMr_nr_mas_13_3 A6  |
| PA14_57630                     | Transcriptional regulator    | PAMr_nr_mas_11_3 C12 |
| PA14_57940 ( <i>rpoN</i> ) (1) | Sigma factor                 | PAMr_nr_mas_11_1 H10 |
| PA14_57940 ( <i>rpoN</i> ) (2) | Sigma factor                 | PAMr_nr_mas_14_3 B11 |
| PA14_58000 ( <i>sodM</i> )     | Superoxide Dismutase         | PAMr_nr_mas_07_3 B5  |
| PA14_58300                     | Two-component system         | PAMr_nr_mas_09_3 E8  |
| PA14_58320 (1)                 | Two-component system         | PAMr_nr_mas_06_1 C4  |
| PA14_58320 (2)                 | Two-component system         | PAMr_nr_mas_09_4 F8  |
| PA14_58380                     | Transcriptional regulator    | PAMr_nr_mas_12_2 A8  |
| PA14_58670 ( <i>ampD</i> )     | $\beta$ -lactamase repressor | PAMr_nr_mas_10_4 A4  |
| PA14_59240 ( <i>piL2</i> )     | Two-component system         | ExMr_nr_mas_01_1 F10 |
| PA14_59770 ( <i>rcsB</i> )     | Two-component system         | PAMr_nr_mas_10_2 E11 |
| PA14_59780 ( <i>rcsC</i> ) (1) | Two-component system         | PAMr_nr_mas_05_3 D6  |
| PA14_59780 ( <i>rcsC</i> ) (2) | Two-component system         | PAMr_nr_mas_15_1 G10 |
| PA14_59790 ( <i>pvrR</i> ) (1) | Two-component system         | PAMr_nr_mas_08_1 E6  |
| PA14_59790 ( <i>pvrR</i> ) (2) | Two-component system         | PAMr_nr_mas_15_2 A11 |
| PA14_59800 ( <i>pvrS</i> ) (1) | Two-component system         | PAMr_nr_mas_01_4 A5  |

|                                |                           |                      |
|--------------------------------|---------------------------|----------------------|
| PA14_59800 ( <i>pvrS</i> ) (2) | Two-component system      | PAMr_nr_mas_05_1 G11 |
| PA14_60250 ( <i>pilS</i> )     | Two-component system      | PAMr_nr_mas_06_3 G7  |
| PA14_60260 ( <i>pilR</i> )     | Two-component system      | PAMr_nr_mas_07_4 F6  |
| PA14_60600 ( <i>rtcR</i> ) (1) | Transcriptional regulator | PAMr_nr_mas_05_4 E7  |
| PA14_60600 ( <i>rtcR</i> ) (2) | Transcriptional regulator | PAMr_nr_mas_13_4 D2  |
| PA14_60860 ( <i>nfxB</i> )     | Transcriptional regulator | PAMr_nr_mas_13_4 A11 |
| PA14_61020 (1)                 | Two-component system      | PAMr_nr_mas_05_4 B12 |
| PA14_61020 (2)                 | Two-component system      | PAMr_nr_mas_14_4 C6  |
| PA14_61040 ( <i>katB</i> ) (1) | Catalase                  | PAMr_nr_mas_02_3 B12 |
| PA14_61040 ( <i>katB</i> ) (2) | Catalase                  | PAMr_nr_mas_04_4 G9  |
| PA14_61620                     | Transcriptional regulator | PAMr_nr_mas_05_4 C5  |
| PA14_62260 (1)                 | Two-component system      | PAMr_nr_mas_07_4 A1  |
| PA14_62260 (2)                 | Two-component system      | PAMr_nr_mas_15_1 F7  |
| PA14_62490 ( <i>dksA</i> )     | Transcriptional regulator | PAMr_nr_mas_10_1 B12 |
| PA14_62530 ( <i>cbrA</i> ) (1) | Two-component system      | PAMr_nr_mas_06_2 A7  |
| PA14_62530 ( <i>cbrA</i> ) (2) | Two-component system      | PAMr_nr_mas_15_1 F6  |
| PA14_62540 ( <i>cbrB</i> )     | Two-component system      | PAMr_nr_mas_14_3 D8  |
| PA14_63070                     | Transcriptional regulator | PAMr_nr_mas_01_2 G9  |
| PA14_63150 ( <i>pmrA</i> )     | Two-component system      | PAMr_nr_mas_07_4 F7  |
| PA14_63160 ( <i>pmrB</i> ) (1) | Two-component system      | ExMr_nr_mas_01_2 B4  |
| PA14_63160 ( <i>pmrB</i> ) (2) | Two-component system      | PAMr_nr_mas_07_1 B8  |
| PA14_63170                     | Transcriptional regulator | PAMr_nr_mas_02_3 F5  |
| PA14_63210                     | Two-component system      | PAMr_nr_mas_13_3 H4  |
| PA14_63250 (1)                 | Two-component system      | PAMr_nr_mas_06_3 F11 |
| PA14_63250 (2)                 | Two-component system      | PAMr_nr_mas_15_2 C8  |
| PA14_63280                     | Transcriptional regulator | PAMr_nr_mas_13_3 A2  |
| PA14_63520                     | Transcriptional regulator | PAMr_nr_mas_02_3 B4  |
| PA14_63880 (1)                 | Transcriptional regulator | PAMr_nr_mas_11_2 G7  |
| PA14_63880 (2)                 | Transcriptional regulator | PAMr_nr_mas_11_3 C7  |
| PA14_64050 (1)                 | Two-component system      | PAMr_nr_mas_11_2 C11 |
| PA14_64050 (2)                 | Two-component system      | PAMr_nr_mas_13_2 G7  |
| PA14_64230 ( <i>retS</i> )     | Two-component system      | PAMr_nr_mas_01_4 C2  |
| PA14_64500                     | Transcriptional regulator | PAMr_nr_mas_13_2 H5  |
| PA14_64640                     | Transcriptional regulator | PAMr_nr_mas_13_3 C2  |
| PA14_64690                     | Transmembrane sensor      | PAMr_nr_mas_07_4 H3  |
| PA14_64700                     | Sigma factor              | PAMr_nr_mas_01_3 E12 |
| PA14_64780                     | Transcriptional regulator | PAMr_nr_mas_03_1 G10 |
| PA14_64910                     | Transcriptional regulator | PAMr_nr_mas_06_4 G3  |
| PA14_65450 ( <i>motA</i> ) (1) | Two-component system      | PAMr_nr_mas_03_2 E7  |
| PA14_65450 ( <i>motA</i> ) (2) | Two-component system      | PAMr_nr_mas_12_3 D12 |
| PA14_65860                     | Two-component system      | PAMr_nr_mas_04_2 F4  |



|                                |                                        |                      |
|--------------------------------|----------------------------------------|----------------------|
| PA14_65880 (1)                 | Two-component system                   | PAMr_nr_mas_13_4 D10 |
| PA14_65880 (2)                 | Two-component system                   | PAMr_nr_mas_13_4 G7  |
| PA14_65880 (3)                 | Two-component system                   | PAMr_nr_mas_15_2 G11 |
| PA14_65900                     | Transcriptional regulator              | PAMr_nr_mas_14_1 H4  |
| PA14_65950                     | Transcriptional regulator              | PAMr_nr_mas_03_2 F7  |
| PA14_65970                     | Transcriptional regulator              | ExMr_nr_mas_01_2 E10 |
| PA14_66320                     | Two-component system                   | PAMr_nr_mas_11_4 B4  |
| PA14_66490 (1)                 | Transcriptional regulator              | PAMr_nr_mas_07_1 E10 |
| PA14_66490 (2)                 | Transcriptional regulator              | PAMr_nr_mas_10_2 A12 |
| PA14_66530                     | Transcriptional regulator              | PAMr_nr_mas_05_1 G2  |
| PA14_66850                     | Transcriptional regulator              | PAMr_nr_mas_13_4 F4  |
| PA14_67140                     | Predicted endoribonuclease             | PAMr_nr_mas_12_3 F6  |
| PA14_67170 (1)                 | Transcriptional regulator              | PAMr_nr_mas_12_1 E1  |
| PA14_67170 (2)                 | Transcriptional regulator              | PAMr_nr_mas_13_1 G8  |
| PA14_67170 (3)                 | Transcriptional regulator              | PAMr_nr_mas_15_2 B4  |
| PA14_67550                     | Transcriptional regulator              | PAMr_nr_mas_11_4 G3  |
| PA14_67670 ( <i>ntrB</i> )     | Two-component system                   | PAMr_nr_mas_12_4 D4  |
| PA14_67680 ( <i>ntrC</i> ) (1) | Two-component system                   | PAMr_nr_mas_02_4 H1  |
| PA14_67680 ( <i>ntrC</i> ) (2) | Two-component system                   | PAMr_nr_mas_04_3 E10 |
| PA14_68110 (1)                 | Transcriptional regulator              | PAMr_nr_mas_10_3 F11 |
| PA14_68110 (2)                 | Transcriptional regulator              | PAMr_nr_mas_15_3 A7  |
| PA14_68230 (1)                 | Two-component system                   | PAMr_nr_mas_06_1 H2  |
| PA14_68230 (2)                 | Two-component system                   | PAMr_nr_mas_15_1 G3  |
| PA14_68250 (1)                 | Two-component system                   | PAMr_nr_mas_10_1 G10 |
| PA14_68250 (2)                 | Two-component system                   | PAMr_nr_mas_14_1 B7  |
| PA14_68260                     | Two-component system                   | PAMr_nr_mas_03_3 G5  |
| PA14_68280 (1)                 | Two-component system                   | PAMr_nr_mas_07_1 A7  |
| PA14_68280 (2)                 | Two-component system                   | PAMr_nr_mas_14_2 G5  |
| PA14_68290                     | Two-component system                   | PAMr_nr_mas_07_3 A12 |
| PA14_68420                     | Transcriptional regulator              | PAMr_nr_mas_12_3 H11 |
| PA14_68550                     | Transcriptional regulator              | PAMr_nr_mas_02_1 F8  |
| PA14_68680 ( <i>envZ</i> ) (1) | Two-component system                   | ExMr_nr_mas_01_1 B8  |
| PA14_68680 ( <i>envZ</i> ) (2) | Two-component system                   | PAMr_nr_mas_07_2 G12 |
| PA14_68680 ( <i>envZ</i> ) (3) | Two-component system                   | PAMr_nr_mas_13_3 C5  |
| PA14_68800 (1)                 | Putative phosphate transport regulator | PAMr_nr_mas_04_2 B10 |
| PA14_68800 (2)                 | Putative phosphate transport regulator | PAMr_nr_mas_05_1 E2  |
| PA14_68920 (1)                 | Transcriptional regulator              | PAMr_nr_mas_09_4 F11 |
| PA14_68920 (2)                 | Transcriptional regulator              | PAMr_nr_mas_10_4 B4  |
| PA14_68920 (3)                 | Transcriptional regulator              | PAMr_nr_mas_15_3 A1  |
| PA14_69370 ( <i>algP</i> ) (1) | Transcriptional regulator              | PAMr_nr_mas_01_1 E4  |
| PA14_69370 ( <i>algP</i> ) (2) | Transcriptional regulator              | PAMr_nr_mas_06_4 B9  |
| PA14_69390 ( <i>algQ</i> )     | Sigma factor                           | PAMr_nr_mas_09_4 B11 |

|                                |                                  |                      |
|--------------------------------|----------------------------------|----------------------|
| PA14_69470 ( <i>algR</i> )     | Two-component system             | PAMr_nr_mas_12_1 D11 |
| PA14_69480 ( <i>algZ</i> )     | Two-component system             | PAMr_nr_mas_05_2 B2  |
| PA14_69630 ( <i>rnk</i> )      | Transcriptional regulator        | PAMr_nr_mas_04_1 H8  |
| PA14_69750                     | Transcriptional regulator        | PAMr_nr_mas_11_1 B6  |
| PA14_69880                     | Transcriptional regulator        | PAMr_nr_mas_06_2 B12 |
| PA14_69900 (1)                 | Two-component system             | PAMr_nr_mas_01_1 G1  |
| PA14_69900 (2)                 | Two-component system             | PAMr_nr_mas_15_1 B6  |
| PA14_69980                     | Transcriptional regulator        | PAMr_nr_mas_01_4 C10 |
| PA14_70080 ( <i>lrp</i> )      | Transcriptional regulator        | PAMr_nr_mas_10_1 C8  |
| PA14_70290                     | Transcriptional regulator        | PAMr_nr_mas_04_4 H10 |
| PA14_70530 (1)                 | Transcriptional regulator        | PAMr_nr_mas_04_1 A8  |
| PA14_70530 (2)                 | Transcriptional regulator        | PAMr_nr_mas_10_3 F5  |
| PA14_70570 ( <i>recG</i> )     | Transcriptional regulator        | PAMr_nr_mas_04_4 G2  |
| PA14_70580                     | Two-component system             | PAMr_nr_mas_01_2 A11 |
| PA14_70750 ( <i>phoB</i> ) (1) | Two-component system             | ExMr_nr_mas_01_2 C7  |
| PA14_70750 ( <i>phoB</i> ) (2) | Two-component system             | PAMr_nr_mas_12_3 A6  |
| PA14_70760 ( <i>phoR</i> )     | Two-component system             | PAMr_nr_mas_09_2 C1  |
| PA14_70790                     | Two-component system             | PAMr_nr_mas_08_4 D1  |
| PA14_70800 ( <i>phoU</i> )     | Transcriptional regulator        | PAMr_nr_mas_01_4 C5  |
| PA14_70860                     | Two-component system             | PAMr_nr_mas_05_1 D10 |
| PA14_70970 ( <i>betI</i> )     | Transcriptional regulator        | PAMr_nr_mas_10_3 G8  |
| PA14_71070                     | Transcriptional regulator        | PAMr_nr_mas_01_3 G2  |
| PA14_71090                     | Transcriptional regulator        | PAMr_nr_mas_08_3 H3  |
| PA14_71200                     | Translation initiation inhibitor | PAMr_nr_mas_05_2 H3  |
| PA14_71640 ( <i>hypT</i> )     | Transcriptional regulator        | PAMr_nr_mas_04_2 D2  |
| PA14_71680 (1)                 | Transcriptional regulator        | ExMr_nr_mas_01_2 C8  |
| PA14_71680 (2)                 | Transcriptional regulator        | PAMr_nr_mas_04_3 E5  |
| PA14_71750                     | Transcriptional regulator        | PAMr_nr_mas_12_1 B1  |
| PA14_71780                     | Transcriptional regulator        | PAMr_nr_mas_02_4 G8  |
| PA14_72380 ( <i>algB</i> )     | Two-component system             | PAMr_nr_mas_01_3 B9  |
| PA14_72390                     | Two-component system             | PAMr_nr_mas_07_1 D4  |
| PA14_72420 (1)                 | Two-component system             | PAMr_nr_mas_05_4 H11 |
| PA14_72420 (2)                 | Two-component system             | PAMr_nr_mas_15_1 E11 |
| PA14_72510 ( <i>thrB</i> )     | Serine/Threonine kinase          | PAMr_nr_mas_03_3 C11 |
| PA14_72560 ( <i>np20</i> )     | Transcriptional regulator        | PAMr_nr_mas_10_3 C3  |
| PA14_72650                     | Transcriptional regulator        | PAMr_nr_mas_04_1 F2  |
| PA14_72690 (1)                 | Two-component system             | PAMr_nr_mas_02_1 D9  |
| PA14_72690 (2)                 | Two-component system             | PAMr_nr_mas_10_1 H10 |
| PA14_72720                     | Transcriptional regulator        | PAMr_nr_mas_10_4 B6  |
| PA14_72740                     | Two-component system             | PAMr_nr_mas_10_3 H7  |
| PA14_72760                     | Two-component system             | PAMr_nr_mas_03_2 F12 |
| PA14_72850                     | Two-component system             | PAMr_nr_mas_11_3 B4  |

|                                                                                       |                                                                                                                                                                |                                                                 |
|---------------------------------------------------------------------------------------|----------------------------------------------------------------------------------------------------------------------------------------------------------------|-----------------------------------------------------------------|
| PA14_72890                                                                            | Transcriptional regulator                                                                                                                                      | PAMr_nr_mas_02_4 D11                                            |
| PA14_73020                                                                            | Two-component system                                                                                                                                           | PAMr_nr_mas_05_3 F3                                             |
| PA14_73190 ( <i>glmR</i> ) (1)                                                        | Transcriptional regulator                                                                                                                                      | PAMr_nr_mas_03_3 H4                                             |
| PA14_73190 ( <i>glmR</i> ) (2)                                                        | Transcriptional regulator                                                                                                                                      | PAMr_nr_mas_07_1 D6                                             |
| <b><i>PA14 transposon insertion mutant library</i></b><br><b><i>Other mutants</i></b> | <b>PAMr: PA14 wild-type background, MAR2xT7 transposon, Gm<sup>r</sup></b>                                                                                     | <b>M. Ausubel, Harvard (4)</b>                                  |
| PA14_32400 ( <i>mexE</i> )                                                            | RND multidrug efflux membrane protein                                                                                                                          | PAMr_nr_mas_13_3 E11                                            |
| PA14_32390 ( <i>mexF</i> )                                                            | RND multidrug efflux transporter                                                                                                                               | PAMr_nr_mas_07_1 B11                                            |
| PA14_32380 ( <i>oprN</i> )                                                            | RND multidrug efflux outer membrane protein                                                                                                                    | PAMr_nr_mas_13_4 B8                                             |
| PA14_60850 ( <i>mexC</i> ) (1)                                                        | RND multidrug efflux membrane protein                                                                                                                          | PAMr_nr_mas_01_4 H2                                             |
| PA14_60850 ( <i>mexC</i> ) (2)                                                        | RND multidrug efflux membrane protein                                                                                                                          | PAMr_nr_mas_15_1 H5                                             |
| PA14_60830 ( <i>mexD</i> ) (1)                                                        | RND multidrug efflux transporter                                                                                                                               | PAMr_nr_mas_03_1 A9                                             |
| PA14_60830 ( <i>mexD</i> ) (2)                                                        | RND multidrug efflux transporter                                                                                                                               | PAMr_nr_mas_12_3 A1                                             |
| PA14_60820 ( <i>oprJ</i> )                                                            | RND multidrug efflux outer membrane protein                                                                                                                    | PAMr_nr_mas_12_1 D6                                             |
| PA14_05310 ( <i>gshB</i> )                                                            | Glutathione synthetase                                                                                                                                         | PAMr_nr_mas_10_3 E9                                             |
| PA14_05300 ( <i>tonB3</i> ) (1)                                                       | TonB-domain containing protein                                                                                                                                 | PAMr_nr_mas_04_4 B5                                             |
| PA14_05300 ( <i>tonB3</i> ) (2)                                                       | TonB-domain containing protein                                                                                                                                 | PAMr_nr_mas_15_2 G8                                             |
| PA14_07355 ( <i>rclX</i> )                                                            | Predicted peroxiredoxin                                                                                                                                        | PAMr_nr_mas_02_4 H11                                            |
| PA14_70390 ( <i>crc</i> )                                                             | Catabolite repression control protein                                                                                                                          | PAMr_nr_mas_11_1 E7                                             |
| <b><i>Pseudomonas aeruginosa</i></b>                                                  |                                                                                                                                                                |                                                                 |
| $\Delta rclR$                                                                         | $\Delta rclR$ in-frame deletion in the PA14 background                                                                                                         | This study                                                      |
| $\Delta rclX$                                                                         | $\Delta rclX$ in-frame deletion in the PA14 background                                                                                                         | This study                                                      |
| $\Delta pyeRM-xenB$                                                                   | $\Delta pyeRM-xenB$ in-frame deletion in the PA14 background                                                                                                   | This study                                                      |
| $\Delta oxyR$                                                                         | $\Delta oxyR$ in-frame deletion in the PA14 background                                                                                                         | This study                                                      |
| Clinical 1                                                                            | <i>P. aeruginosa</i> clinical CF isolate                                                                                                                       | Royal Brompton Hospital                                         |
| Clinical 2                                                                            | <i>P. aeruginosa</i> clinical CF isolate                                                                                                                       | Royal Brompton Hospital                                         |
| Clinical 3                                                                            | <i>P. aeruginosa</i> clinical CF isolate                                                                                                                       | Royal Brompton Hospital                                         |
| <b><i>E. coli</i></b>                                                                 |                                                                                                                                                                |                                                                 |
| DH5 $\alpha$                                                                          | Commercial chemically competent cloning strain                                                                                                                 | Invitrogen                                                      |
| CC118 $\lambda$ pir                                                                   | Host strain for pKNG101 replication $\Delta(ara-leu) araD \Delta lacX74 galE galK phoA20 thi-1 rpsE rpoB argE(Am) recA1 R^f (\lambda pir)$                     | K. N. Timmis, Technical University of Braunschweig, Germany (5) |
| <b>Plasmid</b>                                                                        | <b>Description</b>                                                                                                                                             | <b>Source</b>                                                   |
| pCR <sup>TM</sup> -Blunt                                                              | Cloning vector for blunt-end DNA fragments, <i>lac</i> promoter, <i>lacZa-ccdB</i> fusion gene, T7 promoter, pUC origin, Zeocin <sup>r</sup> , Km <sup>r</sup> | Invitrogen                                                      |
| pRK2013                                                                               | Helper plasmid for triparental mating, with <i>tra</i> functions, ColE1 replicon, Km <sup>r</sup>                                                              | (6)                                                             |

|                                                  |                                                                                                                                                        |                                               |
|--------------------------------------------------|--------------------------------------------------------------------------------------------------------------------------------------------------------|-----------------------------------------------|
| pKNG101                                          | Suicide vector in <i>P. aeruginosa</i> , <i>sacB</i> , <i>oriR6K</i> , <i>mobRK2</i> , Sm <sup>r</sup>                                                 | (7)                                           |
| <i>rclR</i> -pKNG101                             | PA14 <i>rclR</i> mutator fragment cloned into the BamHI site in pKNG101 suicide vector, Sm <sup>r</sup>                                                | This study                                    |
| <i>rclX</i> -pKNG101                             | PA14 <i>rclX</i> mutator fragment cloned into the BamHI site in pKNG101 suicide vector, Sm <sup>r</sup>                                                | This study                                    |
| <i>pyeRM-xenB</i> -pKNG101                       | PA14 <i>pyeRM-xenB</i> mutator fragment cloned into the BamHI site in pKNG101 suicide vector, Sm <sup>r</sup>                                          | This study                                    |
| <i>oxyR</i> -pKNG101                             | PA14 <i>oxyR</i> mutator fragment cloned into the XbaI site in pKNG101 suicide vector, Sm <sup>r</sup>                                                 | This study                                    |
| pUCP18                                           | Broad-host-range, <i>E. coli</i> – <i>Pseudomonas</i> shuttle vector, Ap <sup>r</sup> /Cb <sup>r</sup>                                                 | (8)                                           |
| <i>rclR</i> -pUCP18                              | PA14 promoter region and ORF of <i>rclR</i> cloned into the HindIII/XbaI sites in pUCP18, Ap <sup>r</sup> /Cb <sup>r</sup>                             | This study                                    |
| <i>rclX</i> -pUCP18                              | PA14 promoter region and ORF of <i>rclX</i> cloned into the HindIII/XbaI sites in pUCP18, Ap <sup>r</sup> /Cb <sup>r</sup>                             | This study                                    |
| pMP220                                           | Broad-host-range, promoter-probe vector; IncP replicon, <i>lacZ</i> , Tc <sup>r</sup>                                                                  | (9)                                           |
| <i>rclR-lacZ</i>                                 | PA14 promoter region (117 bp) of <i>rclR</i> cloned into the EcoRI/PstI sites upstream of the promoterless <i>lacZ</i> gene in pMP220, Tc <sup>r</sup> | This study                                    |
| <i>rclX-lacZ</i>                                 | PA14 promoter region (117 bp) of <i>rclX</i> cloned into the EcoRI/PstI sites upstream of the promoterless <i>lacZ</i> gene in pMP220, Tc <sup>r</sup> | This study                                    |
| <b>Primer</b>                                    | <b>Sequence 5' to 3'</b>                                                                                                                               | <b>Target and direction</b>                   |
| <b>Primers for constructing deletion mutants</b> |                                                                                                                                                        |                                               |
| rclR-1F                                          | GCGGGATCCGAAGTGGTCGTAGGCTTCC                                                                                                                           | 5' region upstream of <i>rclR</i> , forward   |
| rclR-2R                                          | TCAGCGAGCTGGGTCCATGGGATGAGC                                                                                                                            | 3' region upstream of <i>rclR</i> , reverse   |
| rclR-3F                                          | ATGGACCCAGCTCGCTGAAAGCGCTAC                                                                                                                            | 5' region downstream of <i>rclR</i> , forward |
| rclR-4R                                          | GCGGGATCCTTCGGGTCTGGCCGTAC                                                                                                                             | 3' region downstream of <i>rclR</i> , reverse |
| rclR-5F                                          | GAGTTTCGCCCAGTACACC                                                                                                                                    | 5' region outside of <i>rclR</i> , forward    |
| rclR-6R                                          | GGAAATCAGTGCATCGATGG                                                                                                                                   | 3' region outside of <i>rclR</i> , reverse    |
| rclX-1F                                          | GCGGGATCCGTAGCTGCCGCAAA GCATG                                                                                                                          | 5' region upstream of <i>rclX</i> , forward   |
| rclX-2R                                          | TCACTTTTTGTTCAGCATGGTGATATTCTCC                                                                                                                        | 3' region upstream of <i>rclX</i> , reverse   |
| rclX-3F                                          | ATGCTGAACAAAAAGTGAGGCCGTACAGG                                                                                                                          | 5' region downstream of <i>rclX</i> , forward |
| rclX-4R                                          | GCGGGATCCAACATCCATGTCCG                                                                                                                                | 3' region downstream of                       |

|                                                                    |                                            |                                                     |
|--------------------------------------------------------------------|--------------------------------------------|-----------------------------------------------------|
|                                                                    | ACCTG                                      | <i>rclX</i> , reverse                               |
| rclX-5F                                                            | AAGCTGTTCCAGGGTCCAG                        | 5' region outside of <i>rclX</i> , forward          |
| rclX-6R                                                            | GATGCGGATCAGGTCCATG                        | 3' region outside of <i>rclX</i> , reverse          |
| pyeRM-xenB-1F                                                      | GCGGGATCCTTCACGCAAGACCG<br>CGAAC           | 5' region upstream of <i>pyeRM-xenB</i> , forward   |
| pyeRM-xenB-2R                                                      | TCAGGCCAGGGTCCGATACAGTG<br>GCATGGCGGTGGT   | 3' region upstream of <i>pyeRM-xenB</i> , reverse   |
| pyeRM-xenB-3F                                                      | ATGCCACTGTATCCGACCCTGGCC<br>TGATCG         | 5' region downstream of <i>pyeRM-xenB</i> , forward |
| pyeRM-xenB-4R                                                      | GCGGGATCCCCGTGGTGCTGCTCT<br>TCAACC         | 3' region downstream of <i>pyeRM-xenB</i> , reverse |
| pyeRM-xenB-5F                                                      | TGGCAGAGCGTTGAACGTC                        | 5' region outside of <i>pyeRM-xenB</i> , forward    |
| pyeRM-xenB-6R                                                      | ACCATGGCGAGCAAGTTCG                        | 3' region outside of <i>pyeRM-xenB</i> , reverse    |
| oxyR-1F                                                            | GCTCTAGAATGATCCGTCGGAAT<br>AGG             | 5' region upstream of <i>oxyR</i> , forward         |
| oxyR-2R                                                            | CATGTGGCGGATGGTCTCGAGGG<br>TCATGGCTGCTCA   | 3' region upstream of <i>oxyR</i> , reverse         |
| oxyR-3F                                                            | ATGACCCTCGAGACCATCCGCCAC<br>ATG            | 5' region downstream of <i>oxyR</i> , forward       |
| oxyR-4R                                                            | GCTCTAGAGGTATTCCGGATGGTA<br>GATC           | 3' region downstream of <i>oxyR</i> , reverse       |
| oxyR-5F                                                            | TCGTCGACACCGATGTAGC                        | 5' region outside of <i>oxyR</i> , forward          |
| oxyR-6R                                                            | GTAATCGCGGGCCAGTTC                         | 3' region outside of <i>oxyR</i> , reverse          |
| <b>Primers for cloning <i>rclR</i> and <i>rclX</i> into pUCP18</b> |                                            |                                                     |
| rclR-CF                                                            | CCCAAGCTTGGTGATATTCTCCGT<br>TGCTTTC        | 5' promoter region and <i>rclR</i> ORF, forward     |
| rclR-CR                                                            | GCTCTAGACTTTCAGCGAGCGGA<br>GTC             | 3' promoter region and <i>rclR</i> ORF, reverse     |
| rclX-CF                                                            | CCCAAGCTTGGGATGAGCCGATC<br>AGGT            | 5' promoter region and <i>rclX</i> ORF, forward     |
| rclX-CR                                                            | GCTCTAGAGCCTGTACGGCCTCAC<br>TT             | 3' promoter region and <i>rclX</i> ORF, reverse     |
| <b>Primers for constructing <i>lacZ</i> fusion plasmids</b>        |                                            |                                                     |
| PrclR-F                                                            | CCGGAATTCGGTGATATTCTCCGT<br>TGCTTTC        | 5' <i>rclR</i> promoter region, forward             |
| PrclR-R                                                            | GGCTGCAGGGGATGAGCCGATCA<br>GGTC            | 3' <i>rclR</i> promoter region, reverse             |
| PrclX-F                                                            | CCGGAATTCGGGATGAGCCGATC<br>AGGTC           | 5' <i>rclX</i> promoter region, forward             |
| PrclX-R                                                            | GGCTGCAGGGTGATATTCTCCGTT<br>GCTTTC         | 3' <i>rclX</i> promoter region, reverse             |
| <b>Primers for plasmid sequencing</b>                              |                                            |                                                     |
| pCR <sup>TM</sup> -Blunt and pUCP18 sequencing                     |                                            |                                                     |
| M13 Forward -20                                                    | Refer to pCR <sup>TM</sup> -Blunt sequence | 5' region within pCR <sup>TM</sup> -                |

|                                |                                                                    |                                                         |
|--------------------------------|--------------------------------------------------------------------|---------------------------------------------------------|
|                                | (Invitrogen) and pUCP18 sequence, (8)                              | Blunt and pUCP18 vectors, forward                       |
| M13 Reverse                    | Refer to pCR™-Blunt sequence (Invitrogen) and pUCP18 sequence, (8) | 3' region within pCR™-Blunt and pUCP18 vectors, reverse |
| <i>lacZ</i> plasmid sequencing |                                                                    |                                                         |
| Mid-PrclR                      | CGTCGGGTTACCAGTCTC                                                 | 5' region in <i>rclR</i> promoter, forward              |
| Mid-PrclX                      | ACTGGTTCGAGACTGGTAAC                                               | 5' region in <i>rclX</i> promoter, forward              |
| Mid-lacZ                       | GCACTCCAGCCAGCTTTC                                                 | 3' region in <i>lacZ</i> gene, reverse                  |
| <b>Primers for qRT-PCR</b>     |                                                                    |                                                         |
| rclR-F                         | CATCCCGCTGTACCAGTTGAAC                                             | 133 bp amplicon, forward                                |
| rclR-R                         | GGTCGACTCGTCCATATGCAC                                              | 133 bp amplicon, reverse                                |
| rclX-F                         | TGAACAACCTGGACCGAGTTCGT                                            | 77 bp amplicon, forward                                 |
| rclX-R                         | GAGCATCTTCGGGTGTTGCTT                                              | 77 bp amplicon, reverse                                 |
| PA14_21570-F                   | TGAAAAAGATTTCCCTCGCTTCCT                                           | 152 bp amplicon, forward                                |
| PA14_21570-R                   | GGAACCTTCCTTGGCCTTCTC                                              | 152 bp amplicon, reverse                                |
| PA14_34750-F                   | CGGTGAGTTGCAGATCCATGT                                              | 142 bp amplicon, forward                                |
| PA14_34750-R                   | ATAGGAAAGGTCGGAGTGCCAG                                             | 142 bp amplicon, reverse                                |
| PA14_54120-F                   | CCACGCCGATGTACAACCTCA                                              | 102 bp amplicon, forward                                |
| PA14_54120-R                   | CGCCATTGTTCGAGGACGAA                                               | 102 bp amplicon, reverse                                |
| PA14_26130-F                   | CGCAACCGCATCGTCATG                                                 | 91 bp amplicon, forward                                 |
| PA14_26130-R                   | GCGCATAGTAGAGAGCGTTCAG                                             | 91 bp amplicon, reverse                                 |
| PA14_60490-F                   | CTCATCGAAAAAGGCCGCTACG                                             | 116 bp amplicon, forward                                |
| PA14_60490-R                   | ATGGTACCCATTGGCGTCTTCA                                             | 116 bp amplicon, reverse                                |
| rpoD-F                         | AGGCCGTGAGCAGGGATAC                                                | 113 bp amplicon, forward                                |
| rpoD-R                         | TCCCCATGTCGTTGATCATG                                               | 113 bp amplicon, reverse                                |

**TABLE S2** MexT positively-regulated genes tested for HOCl susceptibility

| PA14 Locus Tag/<br>Gene name <sup>a</sup> | PAO1<br>Locus<br>Tag | Protein description                                     | Conserved<br>MexT-binding<br>site in<br>regulatory<br>region <sup>b</sup> | PA14<br>transposon<br>mutant<br>available <sup>c</sup> | HOCl-sensitive<br>(lag increased >3<br>hours compared<br>to WT) <sup>d</sup> |
|-------------------------------------------|----------------------|---------------------------------------------------------|---------------------------------------------------------------------------|--------------------------------------------------------|------------------------------------------------------------------------------|
| PA14_22420                                | PA3229               | Hypothetical protein                                    | Yes                                                                       | Yes                                                    | No                                                                           |
| PA14_22740                                | PA3205               | Hypothetical protein                                    | No                                                                        | No                                                     | N/A                                                                          |
| PA14_27755                                | PA2813               | Probable glutathione <i>S</i> -<br>transferase          | Yes                                                                       | Yes                                                    | Yes                                                                          |
| PA14_27770                                | PA2812               | Probable ATP-binding<br>component of ABC<br>transporter | No                                                                        | Yes x2                                                 | Yes                                                                          |
| PA14_27780                                | PA2811               | Probable permease of<br>ABC-2 transporter               | No                                                                        | Yes                                                    | No                                                                           |
| PA14_28410                                | PA2759               | Hypothetical protein                                    | Yes                                                                       | Yes                                                    | No                                                                           |
| PA14_32420 <i>mexS</i>                    | PA2491               | Probable oxidoreductase                                 | No                                                                        | No                                                     | N/A                                                                          |
| PA14_32480                                | PA2486               | Hypothetical protein                                    | Yes                                                                       | Yes                                                    | No                                                                           |
| PA14_39060                                | PA1970               | Hypothetical protein                                    | Yes                                                                       | Yes                                                    | Yes                                                                          |
| PA14_41990                                | PA1744               | Hypothetical protein                                    | Yes                                                                       | Yes                                                    | Yes                                                                          |
| PA14_61180                                | PA4623               | Hypothetical protein                                    | Yes                                                                       | No                                                     | N/A                                                                          |
| PA14_64530                                | PA4881               | Hypothetical protein                                    | Yes                                                                       | No                                                     | N/A                                                                          |

<sup>a</sup>Listed are 12 of the 16 genes positively-regulated by MexT (the other 4 are *mexEF-oprN* and *pyeR* genes, shown in the article) (10). <sup>b</sup>The conserved MexT-binding site is found upstream of 10 of these genes, 8 from the table, and *mexE* and *pyeR* (10). <sup>c</sup>PA14 transposon mutants were available in 8 of these 12 genes (4). <sup>d</sup>Of the 8 mutants, 4 displayed HOCl-sensitivity, albeit none were as sensitive as the *mexE* mutant.

## REFERENCES

1. Koshkin A, Nunn CM, Djordjevic S, Ortiz de Montellano PR. 2003. The mechanism of *Mycobacterium tuberculosis* alkylhydroperoxidase AhpD as defined by mutagenesis, crystallography, and kinetics. *J Biol Chem* 278:29502-8.
2. Nunn CM, Djordjevic S, Hillas PJ, Nishida CR, Ortiz de Montellano PR. 2002. The crystal structure of *Mycobacterium tuberculosis* alkylhydroperoxidase AhpD, a potential target for antitubercular drug design. *J Biol Chem* 277:20033-40.
3. Rahme LG, Stevens EJ, Wolfort SF, Shao J, Tompkins RG, Ausubel FM. 1995. Common virulence factors for bacterial pathogenicity in plants and animals. *Science* 268:1899-902.
4. Liberati NT, Urbach JM, Miyata S, Lee DG, Drenkard E, Wu G, Villanueva J, Wei T, Ausubel FM. 2006. An ordered, nonredundant library of *Pseudomonas aeruginosa* strain PA14 transposon insertion mutants. *Proc Natl Acad Sci U S A* 103:2833-8.
5. Herrero M, de Lorenzo V, Timmis KN. 1990. Transposon vectors containing non-antibiotic resistance selection markers for cloning and stable chromosomal insertion of foreign genes in gram-negative bacteria. *J Bacteriol* 172:6557-67.
6. Figurski DH, Helinski DR. 1979. Replication of an origin-containing derivative of plasmid RK2 dependent on a plasmid function provided in trans. *Proc Natl Acad Sci U S A* 76:1648-52.
7. Kaniga K, Delor I, Cornelis GR. 1991. A wide-host-range suicide vector for improving reverse genetics in gram-negative bacteria: inactivation of the *blaA* gene of *Yersinia enterocolitica*. *Gene* 109:137-41.
8. Schweizer HP. 1991. *Escherichia-Pseudomonas* shuttle vectors derived from pUC18/19. *Gene* 97:109-21.
9. Spaink HP, Okker RJ, Wijffelman CA, Pees E, Lugtenberg BJ. 1987. Promoters in the nodulation region of the *Rhizobium leguminosarum* Sym plasmid pRL1JI. *Plant Mol Biol* 9:27-39.
10. Tian ZX, Fargier E, Mac Aogain M, Adams C, Wang YP, O'Gara F. 2009. Transcriptome profiling defines a novel regulon modulated by the LysR-type transcriptional regulator MexT in *Pseudomonas aeruginosa*. *Nucleic Acids Res* 37:7546-59.
